# Supplementary material for: The combined effect of two westerly jet waveguides on heavy haze in the North China Plain in November and December 2015
Source: Copernicus journal article supplement (doi:10.5194/acp-2019-826), 2019-11-18
Supplement: Supplementary file [file acp-2019-826-AC2-supplement.pdf]

We appreciate the reviewer for carefully reviewing our manuscripts and providing the valuable suggestion to improve quality for our paper. We have carefully read your comments and revised the manuscripts as suggested. The following are our responses to your comments point by point. The red sentences are your comments (italics), and the black sentences are the author's responses, and the green sentences and words are the specific revisions.

## **Anonymous Referee #1**

*The combined effect of two westerly jet waveguides on heavy haze in the North China Plain in November and December 2015*

*Xiadong An, Lifang Sheng, Qian Liu, Chun Li, Yang Gao, and Jianping Li*

*This manuscript presents an analysis of a heavy haze event in the North China Plain (NCP) in 2015, aiming to determine possible influences of the large-scale circulation on the event. It is shown that the strong haze event coincided with a wave-like pattern in the upper-tropospheric meridional wind field spanning Eurasia. It is then shown that this pattern is in fact very similar to the leading EOF of that field, and it is suggested that this setup is vulnerable to haze events in the NCP because it is associated with (1) subsidence and increased lower-tropospheric static stability in the NCP region (forced by the polar front wave guide) and (2) additional subsidence in the NCP region resulting from ascent and diabatic heating in South China (forced by the subtropical waveguide).*

*This topic is of strong importance and the study helps clarify the mechanisms by which the large-scale dynamics influences local air quality in China. I do however have a number of concerns which I would like to see addressed before publication.*

### **Main comments**

*- Your analysis uses mostly time-mean fields together with the Plumb stationary wave activity flux, but in abstract you say 'The Rossby wave propagated eastward along the subtropical jet' (line 8). After reading the manuscript I am now imagining a stationary Rossby wave with an eastward group velocity (i.e. fixed ridge and trough positions, but wave activity propagating downstream), but certainly did not imagine that when I first read the abstract. Have I interpreted this correctly? Given its repeated use and importance throughout the manuscript, I wonder if there is a more precise terminology for this process? At the very least I would like to see this point clarified in the abstract and in your description of it in the manuscript.*

*- It is argued that it is the 'combined effect...of two Rossby waveguides' that leads to these conditions and is therefore responsible for the haze. Whilst this seems plausible, I struggled to see much direct evidence to support the second route, specifically the fact that ascent and diabatic heating in South China should lead to descent further north. Given that the 'combined effects' or both routes this makes it into the title, I would like to see the argument made more precise.*

### **Response:**

Thanks for your valuable suggestion. Yes, your interpretation is right. Our expression about the propagation of Rossby energy is similar to that of predecessors. For example, Li et al. (2015) and Ding et al. (2017) found the Rossby wave originated from northwest Europe, entered into the North Africa-Asia (NAA) westerly jet, and then propagated eastward along subtropical NAA jet. Plumb (1985) gave the three-dimensional wave activity flux of stationary Rossby wave using the conservation relation of small amplitude stationary wave propagating in zonal flow, which represents the propagation direction of wave

energy. According to Plumb's definition, the wave activity flux reflects the sustained propagation of quasi stationary wave energy to the area of East Asia and West Pacific during this period when the Eurasian Continental trough and ridge is fixed. That is to say, anomalous stationary Rossby wave with an eastward group velocity will cause circulation anomalies, and further lead to change for trough and ridge because of wave activity propagating downstream. In order to solve this confusion, we have added the following (green font) in the manuscripts to explain that the circulation anomaly caused by the eastward propagation of the anomalous Rossby wave results in haze in the NCP.

**L15-18:** ... In this paper, the combined effect of the anomalous stationary Rossby waves within two westerly jet waveguides on haze in the NCP was investigated based on visibility observational data and NCEP/NCAR reanalysis data. The results showed that the circulation anomalies in Eurasia caused by the anomalous stationary Rossby waves energy propagating along two waveguides within the westerly jet originating from the Mediterranean were responsible for haze formation in the NCP.

**L259-261:** According to the definition, the wave activity flux reflects the sustained propagation of quasi stationary wave energy to the area of East Asia and West Pacific during this period when the Eurasian Continental trough and ridge is fixed (Plumb, 1985).

**L264-265:** The propagation of the Rossby wave active flux to the downstream causes the circulation anomaly in the downstream region.

Firstly, we can find there is anomalous anticyclonic circulation form regression of the 200 hPa horizontal wind anomalies (figure 8a) and 500 hPa geopotential height anomalies (figure 9) regressed onto the standardized -PC1 of the leading EOF mode for 200 hPa meridional wind anomalies, which supported the second route leading to haze in the NCP. Besides, the direct evidence that results in further descent in North is the ascent in South China, which can be also found from figure 6. Figure 6 shows composed sections of the actual values of winds during the periods of November 9-15 and 19-21, December 6-10 and 19-25 in 2015 (We are sorry that we left out time information in figure 6 in the manuscripts) when heavy haze occurred in NCP and precipitation happened in South China. The local circulation showed in figure 6 includes the ascent in the South China and the descent in the NCP. To make sure the configuration of this ascent and descent motion, you can find that there were negative vorticity anomalies at 850hPa (figure 3d), and anomalous anticyclone and downward vertical speed at 500hPa (figure 4b) when haze occurred in North China Plain (NCP), which means that there was a descent motion in NCP. Missing information has been added in caption of figure 6.

As for diabatic heating, we try to confirm it by the change of circulation pattern with and without precipitation when haze occurred in NCP. But the result is unsatisfied. There may be the influence of other meteorological factors, because the above two situations did not occur at the same time. However, Wang et al. (2019) found that the airflow convergence primarily occurs over the southwestern portion of the western North Pacific sector, where the strongly significant and positive rainfall anomaly is triggered. The enhanced significant rainfall heating may greatly intensify the ascending motion over the western North Pacific sector and the adjacent region, resulting in subsidence over the Beijing–Tianjin–Hebei region and Northeast Asia via an anomalous local meridional cell. Simulations of an anomaly atmospheric general circulation model also supported their hypothesis (Wang et al., 2019). According to their study and figure 6, we can draw a conclusion that rainfall heating may greatly intensify the ascending motion over the South China resulting in subsidence over the NCP. We have carefully analyzed

the local circulation that ascent in South China and descend in NCP and added relevant references for diabatic heating intensifying the ascending motion in South China in our manuscripts.

**L213-215:** Figure 6 shows composed sections of the actual values during the periods of November 9-15 and 19-21, December 6-10 and 19-25 in 2015. We can find there will be a local circulation in China when there is precipitation in South China (Figure 6). This local circulation includes the ascent in the South China and the descent in NCP.

**L274-278:** Wang et al. (2019) found that the enhanced significant rainfall heating may greatly intensify the ascending motion over the western North Pacific sector and the adjacent region, resulting in subsidence over the Beijing–Tianjin–Hebei region and Northeast Asia via an anomalous local meridional cell. The latent heat released by precipitation as a heat source strengthened the abnormally ascending motion in South China, which further strengthened the anticyclone anomaly in the NCP.

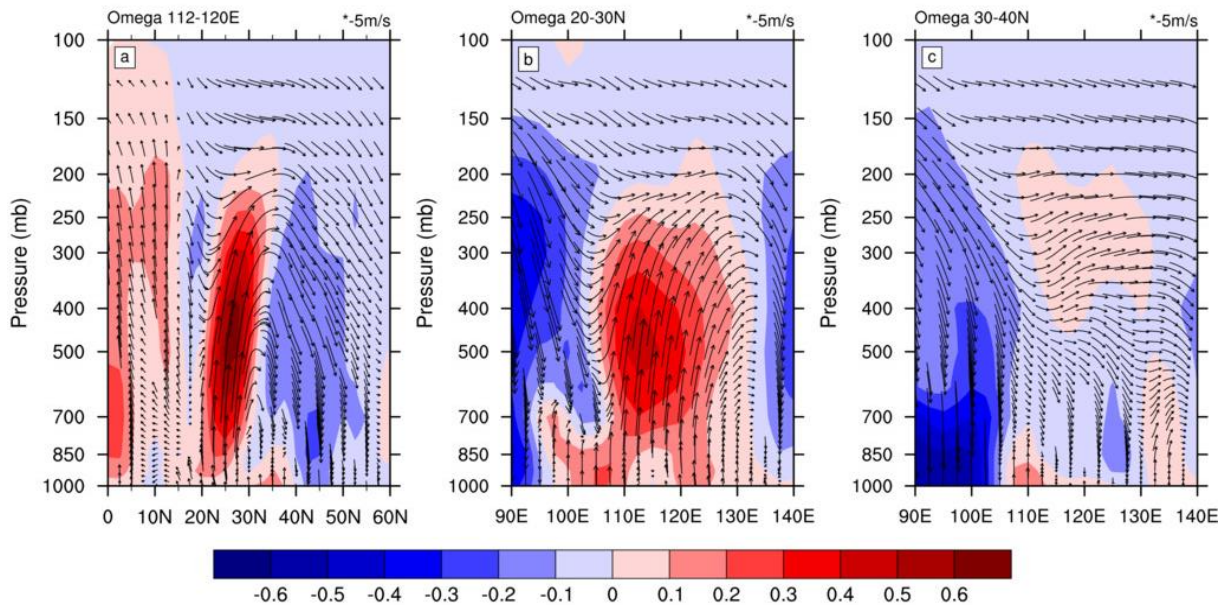

Figure 6: Composed sections of the actual values during the periods of November 9-15 and 19-21, December 6-10 and 19-25 in 2015: latitude-height sections with average longitude in 112°E-120°E of vertical velocity (shading, unit:  $-5 \text{ m s}^{-1}$ ) and wind vector ( $u$  and  $\omega$ ) (a); longitude-height sections with average latitude in 20°N-30°N (b) and in 30°N-40°N (c) of vertical velocity (shading, unit:  $-5 \text{ m s}^{-1}$ ) and wind vector ( $u$  and  $\omega$ ).

### **Other comments**

- L10. You say 'resulted in a stable atmosphere', but this is only true for the lower-troposphere. Please amend (I note Reviewer 2 also made this point later on in the manuscript).

**Response:** Thanks for your suggestion. Indeed, reviewer 2 also pointed this error. And we have revised it as suggested.

**L21-22:** ... subsequently resulted in a stable lower-atmosphere. ...

- L24-25. You say 'The latent heat released by rainfall acted as a heat source, inducing convection over South China'. I don't get the logic here. Do you distinguish between convective and non-convective rainfall? Where in the text do you justify the point that diabatic heating from non-convective rainfall leads to convection?

**Response:** We are sorry we didn't express our intention accurately. We just think that the rainfall may further strengthen the ascending motion due to the release of diabatic heating. Wang et al. (2019) confirmed this point, they believed that the enhanced significantly rainfall heating may greatly intensify the ascending motion over the western North Pacific. The sentences have been revised based on previous studies and your suggestions.

**L26-27:** ... jet occurred in a large area of southern China. The latent heat released by rainfall acted as a heat source, **intensifying the ascending motion over South China so that the descending motion over the NCP was strengthened**, favoring the maintenance ...

- L25-26. I think the conclusion that the ascending motion over South China helps maintain the descent over the NCP is too speculative to be stated in the abstract, given the evidence presented.

**Response:** We are sorry for this confusion. We can find omega is positive anomalies (descending) in NCP and negative anomalies (ascending) in South China in November and December 2015 (figure 4b). In addition, we can also find omega is positive (descending) in NCP and negative (ascending) in South China during the periods of November 9-15 and 19-21, December 6-10 and 19-25, 2015 (there was rainfall in South China in this time). Interestingly, we find that the ascendant air in South China flows northward near 200hPa – 250hPa, and then descend in North China (figure 6a), which support the conclusion that the ascending motion over South China helps maintain the descent over the NCP. We have made the following modifications to show this evidence.

**L225-228:** ... **In addition, we find that the ascendant air in South China flows northward near 200hPa – 250hPa, and then descend in North China (figure 6a) when there is rainfall in South China and heavy haze in the NCP at the same period.** The north-south circulation system **is conducive** to the maintenance of haze in the NCP, whereas large-scale precipitation occurred in southern China.

- L39. I wasn't familiar with the term 'haze-fog'. Please could you clarify its definition?

**Response:** We are glad to explain the term. Fog and haze are both weather phenomenon with reduced visibility. Haze is the phenomenon caused by the increase or the hygroscopic growth of aerosols at a high relative humidity (Ma et al., 2014). Fog is caused by condensation of water vapor in the air near the ground (Wu et al., 2009). Haze-fog means fog and haze appear at the same time. We give the haze definition in line 30-31 since haze is mainly discussed in our manuscripts. For a better understanding, we have added the definition of fog and haze-fog in the manuscripts.

**L31-32:** ... **Fog is also the phenomenon reduced visibility caused by condensation of water vapor in the air near the ground (Wu et al., 2009). When fog and haze appear at the same time, it is called haze-fog.**

L46. What do you mean by the 'contribution rate is 45%'? Is this the fraction of variance explained? Please clarify.

**Response:** We are sorry for this confusion. It is indeed the fraction of variance. According to Li et al. (2019), based on singular

value decomposition (SVD), the EU at the 500 hPa isostatic surface is the most important pattern affecting haze-fog in northern China, and its contribution rate is 45%. The sentence has been corrected properly.

**L47-48:** Li et al. (2019) reported that the Eurasian teleconnection (EU) at 500 hPa is the most important pattern affecting haze-fog in northern China using singular value decomposition, and its fraction of variance is 45%.

- L70. 'large' -> 'large-scale'.

**Response:** Thanks for your suggestion. We have revised it as suggested.

**L73:** ... the influence of large-scale atmospheric ...

- L95. I noted you have added the Cressman (1959) reference following a comment from Reviewer 2, but there is a typo in the author name.

**Response:** Thanks for checking our reply in time. The author name has been revised.

**L97-98:** Visibility station data were interpolated to the regular grid of 0.5°× 0.5° using Cressman interpolation method (Cressman, 1959).

- L104. What do you mean by 'anomalous propagation of Rossby waves'? I was not 100% sure of the methodology here. Is 'perturbation streamfunction' (L107) the same this as streamfunction anomaly (as defined in L117), or is it an anomaly from the zonal mean? Do you compute this from monthly mean fields? Please clarify the method.

**Response:** We are sorry for this confusion. We mean the propagation of anomalous Rossby waves. And 'perturbation streamfunction' (L107) is the same as streamfunction anomaly (as defined in L117). We compute this according to monthly mean fields. We have added more information for the method as follows.

**L107-108:** To analyze the propagation of anomalous Rossby waves, we calculated horizontal stationary wave activity flux based on monthly-mean data to show the propagation of wave energy using the method of Plumb (1985) (4):

**L111-112:** ... Geopotential anomalies calculated according to equation 10 will be used to compute perturbation streamfunction.

- Eq 4. You have mis-placed the close bracket on the bottom line of the vector.

**Response:** Indeed, we have mis-placed the close bracket. The equation has been revised.

$$\mathbf{L109: } F = p_0 \cos\phi \begin{pmatrix} \frac{1}{2a^2 \cos^2\phi} \left[ \left( \frac{\partial \psi'}{\partial \lambda} \right)^2 - \psi' \frac{\partial^2 \psi'}{\partial \lambda^2} \right] \\ \frac{1}{2a^2 \cos^2\phi} \left( \frac{\partial \psi'}{\partial \lambda} \frac{\partial \psi'}{\partial \phi} - \psi' \frac{\partial^2 \psi'}{\partial \lambda \partial \phi} \right) \end{pmatrix}$$

- L115. I noted you have added a definition of 'Norm' following a comment from Reviewer 2, but define sigma as the 'number

*of values'. Isn't sigma the standard deviation?*

**Response:** Indeed, we usually use sigma for standard deviation. We have replaced sigma with n to distinguish them.

$$\mathbf{L120:} \text{ Norm}(x) = \frac{x - \text{mean}(x)}{n}$$

**L121:** Here, Norm represents standardization,  $x$  is a variable.  $n$  is the number of non-missing value,

*- L132. Your definition of 'static stability' is very confusing, given that the atmosphere is stable when this diagnostic is small, and unstable when it is large. Can you think of a more appropriate name for this variable, or else at least reverse its sign?*

**Response:** Thanks for your suggestion. According to suggestion from you and reviewer 2. We think it is appropriate to replace static stability with the vertical temperature difference (VTD). The sentences have been revised.

**L138-140:** To research the stability of the lower atmosphere, the vertical temperature difference (VTD) is expressed by the vertical difference in the temperature between 1000 hPa and 850 hPa (Liu et al., 2017), which is on average 4.5°C-7.5°C in the NCP. The value of the VTD was small so that the lower ...

*- L136. 'atmosphere' -> 'lower troposphere'*

**Response:** Thanks for your suggestion. We have revised it as proposed.

**L140:** The value of the VTD was small so that the lower troposphere was relatively stable (Figure 3a).

*- L152. What is 'upward flux'?*

**Response:** According to Yang et al. (2016), the upward flux (UP,  $\text{kg s}^{-1}$ ) in Goddard Earth-Observing System (GEOS) chemical transport model (GEOS-Chem) is associated with the convergence of aerosols. The positive regression coefficient of UP indicated the convergence and accumulation of  $\text{PM}_{2.5}$ , which was associated with the occurrence of haze. The sentence has been revised.

**L159:** ... specific humidity, cloud fraction, precipitation rate, and upward flux ( $\text{kg s}^{-1}$ ) associated with the convergence of aerosols, the ...

*- L166: You say the wind 'formed a convergence of cold air in the Middle East...'. Would 'led to the advection of cold air towards the Middle East...' be a more accurate description?*

**Response:** We agree with you and we have revised the sentence as recommended.

**L175-176:** ... strong northerly anomaly over the European continent. The strong northerly wind led to the advection of cold air towards the Middle East and the Mediterranean Sea, ...

*- L174. Are you referring to Fig 4c, not 4b?*

**Response:** Yes, it is figure 4c. We have deleted figure 4b.

**L184:** ... was located in the middle of the cyclonic and anticyclonic anomalies, with strong southerly winds at 850 hPa (Figure

4c),

- L176. You say 'There was a negative phase of the EU', but have not introduced the EU pattern anywhere.

**Response:** We are sorry that we did not introduce EU in our manuscripts. We've added the definition of EU.

**L185-188:** ...Wallace and Gutzler (1981) pointed out the Eurasian Pattern (EU) is one of teleconnections at the 500 hPa in the northern hemisphere in the winter. The EU positive phase corresponds to the negative, positive and negative geopotential height anomalies at 500 hPa over Western Europe, Ural region and Japan, respectively. Otherwise, it is negative phase (Wallace and Gutzler, 1981).

- L180. 'atmosphere' -> 'lower-troposphere'

**Response:** Thanks for your suggestion. We have revised the sentence as suggested.

**L192:** Due to the anticyclonic anomaly in the lower troposphere over the Sea of Japan, ...

- L213. Please state the domain used for the EOF computation (it's stated in the caption, but should also appear in the main text). I'm assuming from the PC timeseries that these EOFs are based on the Nov-Dec average fields for each year (rather than monthly or daily values)? Please clarify.

**Response:** Yes, the PC timeseries that these EOFs are based on the Nov-Dec average fields for each year. We have added more information in the main text.

**L230-232:** ... the first leading EOF mode of the 200 hPa zonal and meridional winds within the domain 0-75°N, 0-160°E based on the average fields of November and December from 1979 to 2017 was calculated.

- L215. You say 'The mode's variance is 25.3%'. Do you mean 'The variance explained by this mode is 25.3%'?

**Response:** We are sorry for this confusion. Yes, the variance explained by this mode is 25.3%. For easier understanding, we have revised the sentence.

**L233:** The variance explained by this mode is 25.3%.

- L218. Same comment.

**Response:** we have revised the sentence.

**L237:** The variance explained by this mode is 23.4%

- L240. 'Plum' -> 'Plumb'

**Response:** Thanks for your suggestion. Author's name has been revised as suggested.

**L259:** ... calculated and generated according to the formula for the wave action flux defined by Plumb (1985).

- Lines 239 to 253. You make a lot of claims regarding the interpretation of the wave activity flux plot without backing them up. E.g. 'energy dispersion over the Siberian area, leading to a negative geopotential height anomaly in this location'. Please can you provide references explaining why this is the case. Similarly why should energy 'dispersed within South China' result

*in a 'large amount of heavy rainfall in South China'?*

**Response:** We're sorry we didn't clearly state the facts. And we admit that the statement here is not very clear.

The South Branch of Rossby wave propagated eastward and break in South China, meaning that there is convergence of Rossby wave energy dispersing from the upstream, which is beneficial to the circulation for precipitation in South China. Li et al. (2015) and Ding et al. (2017) found the dispersion of Rossby wave energy near the Indochina Peninsula, which leads to heavy rainfall in Southern China in winter. Dispersion of Rossby wave energy enhanced anomalous low over the Indo-China Peninsula and high over eastern China, which made northerly wind strongest over southeastern China and induced strong divergence at the first rain day. Moreover, maintenance of the strong Rossby waveguide caused the large spatial persistent heavy rainfall (Ding et al., 2017).

The northerly Rossby wave propagates eastward along the polar front jet guide. When the wave train arrives in Siberia, it causes a negative potential height anomaly center and weakens the Siberian high because its energy is all dispersed from the upstream (Figure 10). When the wave train arrives in North China, it is a positive potential height anomaly, which weakens the East Asian Trough and is conducive to the anomalous descending in the NCP. Luo (2015) found that the north branch of the Rossby wave propagated from the North Atlantic to western Lake Baikal and was seemingly blocked by a blocking high over Lake Baikal, and the development and persistence of which was favored by the energy convergence there. There is also Rossby energy dispersing from upstream and negative anomaly of geopotential height in Siberia (Li et al., 2015; Li et al., 2019). The Rossby wave energy in the middle and upper troposphere may propagate southeastwards into the Asian anticyclonic anomaly centered over the Sea of Japan (ASJ) and its surrounding region, favoring the formation and sustainability of the ASJ and the associated air subsidence (Wang et al., 2019).

We have provided relevant references for our manuscripts.

**L264-266:** The Rossby wave in the polar front jet was stronger than that in the subtropical westerly jet. *The propagation of northerly Rossby wave to the downstream will cause the anomaly of the downstream circulation (Luo, 2005; Li et al., 2015; Li et al., 2019; Wang et al., 2019).*

**L273-274:** *Ding et al. (2017) also found dispersion of Rossby wave energy enhanced anomalous low over the Indo-China Peninsula and high over eastern China, and maintenance of the strong Rossby waveguide caused the large spatial persistent heavy rainfall.*

**L271-272:** Almost all of its energy *dispersing from the upstream was* converged within South China, resulting in anomalous circulation, conducive to a large amount of heavy rainfall in South China.

*- Fig 4 caption. I was confused which of the variables shown are absolute and which are anomalies (e.g. divergence in panel b). Please clarify.*

**Response:** We are sorry for this confusion. The variables shown in figure 4 are anomalies except for the zonal wind (green line). We have added information in the caption of figure 4.

Figure 4: *Westerly jet and anomalous weather maps* in November and December 2015: (a) meridional wind (black contours,



CI (contour interval) = 1 m s<sup>-1</sup>, solid (dashed) lines represent southerly (northerly) wind anomaly), divergence (shading, 10<sup>-5</sup> m s<sup>-1</sup>) and westerly jet (green line) (zonal mean wind, CI > 30 m s<sup>-1</sup>) at 200 hPa; (b) geopotential height (black contours, CI = 10 gpm (geopotential meters), solid (dashed) lines represent positive (negative) geopotential height anomaly) and vertical velocity (shading, 10<sup>-2</sup> Pa s<sup>-1</sup>); negative(positive) values represent ascent (descent) at 500 hPa; (c) geopotential height (red contours, CI = 10 gpm), divergence (shading, 10<sup>-5</sup> m s<sup>-1</sup>) and wind vector (vector, m s<sup>-1</sup>) at 850 hPa. **The variables shown in figure 4 are anomalies but the zonal wind is absolute (green line).**

*- Fig 7 caption. What are the units and contour intervals in panels a and c?*

**Response:** We are sorry for this confusion. Contour interval is 0.01 m s<sup>-1</sup>. We have added information in the caption of figure 7.

**L510:** ... Contour interval is 0.01 m s<sup>-1</sup>; ...

*- Fig 8 caption. From my understanding, the two PCs used for the regression are anticorrelated and yet the resulting patterns in panels a and b have the same signs. Have I misunderstood, or does the panel a regression use -PC1 rather than PC1?*

**Response:** Yes, it is -PC1. Thank you for pointing out this error. We have revised it.

**L514-516:** Figure 8: The 200 hPa horizontal wind anomalies (vector, m s<sup>-1</sup>) and meridional wind anomalies (contours, m s<sup>-1</sup>) regressed onto **the standardized -PC1 of the leading EOF mode for 200 hPa meridional wind anomalies (a) and the standardized PC1 of the leading EOF mode for 200 hPa zonal wind anomalies (b).** ...

*- L480. Do you mean 'the gradient of the zonal wind with the latitude is 0'?*

**Response:** The position of 200hPa jet stream is the place with the maximum value of zonal wind speed in the upper troposphere. The wind speed decreases with the increase of latitude in the north of the jet stream. And the wind speed decreases with the decrease of latitude in the south of the jet stream. Thus, the position where the gradient of zonal wind speed is 0, called the jet axis.

*- Fig 9 caption. What are the units of the shaded field? Presumably this regression is again using the standardised PC1 timeseries?*

**Response:** We're sorry that we didn't provide the units of the shaded field. The units of the shaded field is geopotential meters (gpm). And we use the negative standardized PC1 timeseries to regress geopotential height anomalies. We have added units of the shaded field and revised information as suggested.

**L522-524:** Figure 9: Regression of 500 hPa geopotential height anomalies and 850 hPa wind vector onto the **negative standardized -PC1** of the leading EOF mode for the 200 hPa meridional wind anomaly. The values of shading (**units, gpm**) and arrows (**units, m/s**) ...

*- Fig 10 caption. I expected units of s-2 for the wave activity flux, given Eq 4. Please check.*

**Response:** Thanks for your suggestion. We have carefully check it. Because it is vector flux, units of the wave activity flux is m<sup>-2</sup> s<sup>-2</sup> depending on Eq 4, which have also added in Eq 4.

**L110:** Here,  $F$  is the horizontal stationary wave activity flux ( $\text{m}^{-2} \text{s}^{-2}$ ), ...

- Fig 11. I find this schematic unacceptable in its current form. It shows geopotential height and meridional wind at 200 hPa, but shouldn't these be directly related via geostrophic balance? Perhaps the geopotential is shown at 500 hPa instead? In case it is correct and I have misunderstood what is shown, please clarify.

**Response:** Thanks for your suggestion. As a matter of fact, geopotential should be at 500 hPa. However, it should be noted that the potential height anomaly at 200 hPa is similar to this as a result of the barotropic structure (not shown). We have revised the picture as suggested.

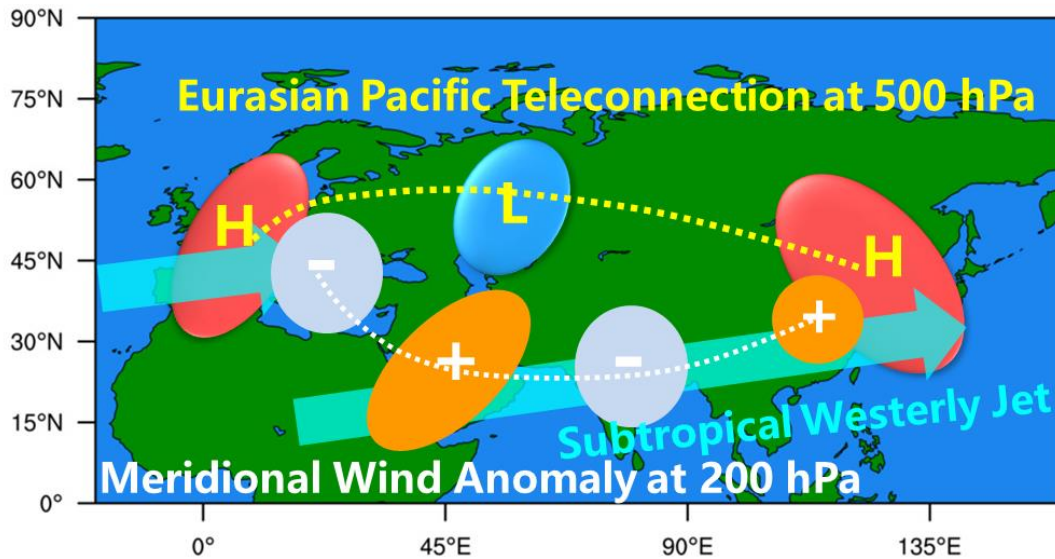

Figure 11: A schematic diagram of the negative EU in the 500 hPa geopotential height field and meridional wind anomaly at 200 hPa in November and December 2015. H (L) denotes positive (negative) geopotential height anomalies; the plus and minus represent positive (southerly) and negative (northerly) meridional wind anomalies, respectively; and the shaded belt of arrow represents the subtropical westerly jet.

## Reference

- Ding, F. and Li, C.: Subtropical westerly jet waveguide and winter persistent heavy rainfall in south China, *J. Geophys. Res. Atmos.*, 122, 7385-7400, doi:10.1002/2017JD026530, 2017.
- Hoskins, B. J., and Rodwell M. J.: A model of the Asian summer monsoon. Part I: The global scale, *J. Atmos. Sci.*, 52, 1329-1356, 1995.
- Li, Y., Sheng, L. F., Li, C., and Wang, Y. H.: Impact of the Eurasian Teleconnection on the Interannual Variability of Haze-Fog in Northern China in January, *Atmosphere*, 10, 113, doi:10.3390/atmos10030113, 2019.

- Liu, Y. M., Wu, G. X., L. H., Liu, P.: The effect of spatially nonuniform heating on the formation and variation of subtropical high part III: Condensation heating and south Asia high and western Pacific subtropical high, *Acta. Meteorological Sinica.*, 57, 5, 1999.
- Li, C. and Sun, J. L.: Role of the subtropical westerly jet waveguide in a southern China heavy rainstorm in December 2013, *Adv. Atmos. Sci.*, 32, 601-612, doi:10.1007/s00376-014-4099-y, 2015.
- Ma, N., Zhao, C. S., Chen, J., Xu, W. Y., Yan, P., and Zhou, X. J.: A novel method for distinguishing fog and haze based on PM<sub>2.5</sub>, visibility, and relative humidity, *Science China: Earth Sciences*, 57, 2156-2164, doi:10.1007/s11430-014-4885-5, 2014.
- Plumb, R.A.: On the three-dimensional propagation of stationary waves, *J. Atmos. Sci.*, 42, 217-229, doi:10.1175/1520-0469(1985)042<0217:OTTDPO>2.0.CO;2, 1985.
- Smagorinsky, J.: The dynamical influence of largescale heat sources and sinks on quasi-stationary mean motions of the atmosphere, *Quart J. Roy. Meteor. Soc.*, 79, 342-366, 1953.
- Wu, G. X., and Liu, H.: The effect of spatially nonuniform heating on the formation and variation of subtropical high part I. Scale analysis, *Acta. Meteorological Sinica.*, 57, 3, 1999.
- Wang, J., Zhu, Z., Qi, L., Zhao, Q., He, J., and Wang, J. X. L.: Two pathways of how remote SST anomalies drive the interannual variability of autumnal haze days in the Beijing–Tianjin–Hebei region, China, *Atmos. Chem. Phys.*, 19, 1521–1535, <https://doi.org/10.5194/acp-19-1521-2019>, 2019.
- Wu, D., Wu, X. J., Zhu, X. X.: *Fog and Haze (in Chinese)*. Beijing: China Meteorological Press, 198, 2009.
- Wallace, J. M. and Gutzler, D. S.: Teleconnections in the geopotential height field during the Northern Hemisphere winter, *Mon. Wea. Rev.*, 109, 784–812, doi:10.1175/1520-0493(1981)109<0784:TITGHF>2.0.CO;2, 1981.

# The combined effect of two westerly jet waveguides on heavy haze in the North China Plain in November and December 2015

Xiadong An<sup>1</sup>, Lifang Sheng<sup>1, 2</sup>, Qian Liu<sup>3</sup>, Chun Li<sup>1, 2</sup>, Yang Gao<sup>4</sup>, and Jianping Li<sup>5</sup>

<sup>1</sup>Department of Marine Meteorology, College of Oceanic and Atmospheric Sciences, Ocean University of China, Qingdao, 266100, China

<sup>2</sup>Ocean-Atmosphere Interaction and Climate Laboratory, Key Laboratory of Physical Oceanography, Ocean University of China, Qingdao, 266100, China

<sup>3</sup>School of Atmospheric Sciences, and Guangdong Province Key Laboratory for Climate Change and Natural Disaster Studies, Sun Yat-sen University, Guangzhou, 510275, China

<sup>4</sup>College of environmental Science and Engineering, Ocean University of China, Qingdao, 266100, China

<sup>5</sup>Key Laboratory of Physical Oceanography–Institute for Advanced Ocean Studies, Ocean University of China and Qingdao National Laboratory for Marine Science and Technology, Qingdao, 266003, China

*Correspondence to:* Lifang Sheng (shenglf@ouc.edu.cn)

**Abstract.** Severe haze occurred in the North China Plain (NCP) from November to December 2015, with a wide spatial range and long duration. In this paper, the combined effect of the anomalous stationary Rossby waves within two westerly jet waveguides on haze in the NCP was investigated based on visibility observational data and NCEP/NCAR reanalysis data. The results showed that the circulation anomalies in Eurasia caused by the anomalous stationary Rossby waves energy propagating along two waveguides within the westerly jet originating from the Mediterranean were responsible for haze formation in the NCP. The Rossby wave propagated eastward along the subtropical westerly jet and the polar front jet, causing an anomalous anticyclone over the Sea of Japan and anticyclonic wind speed shear at 850 hPa over the NCP, which enhanced the anomalous descending air motion in the middle and lower troposphere and subsequently resulted in a stable lower atmosphere. Furthermore, the Rossby wave weakened the East Asia trough and Ural ridge, and strengthened the anomalous southerly wind at 850 hPa over the coastal areas of east China, decelerating the East Asia winter monsoon. The above meteorological conditions modulated haze accumulation in November and December 2015. Meanwhile, continuous rainfall related to ascending motion due to Rossby wave propagation along the subtropical westerly jet occurred in a large area of southern China. The latent heat released by rainfall acted as a heat source, intensifying the ascending motion over South China so that the

descending motion over the NCP was strengthened, favoring the maintenance of severe haze. This study elucidates the formation and maintenance mechanism of large-scale haze in the NCP in late fall and boreal winter.

## 1 Introduction

30 Haze is the phenomenon of reduced visibility caused by the increase in aerosols or the hygroscopic growth of aerosols at a high relative humidity (Ma et al., 2014). Fog is also the phenomenon reduced visibility caused by condensation of water vapor in the air near the ground (Wu et al., 2009). When fog and haze appear at the same time, it is called haze-fog. In December 2015, the air quality was poor in the North China Plain (NCP), especially in the Beijing-Tianjin-Hebei region (Chang et al., 2016; Zhang et al., 2016; Zhang et al., 2019). Based on the emissions level in December 2015 and the Weather Research and

35 Forecasting-Community Multiscale Air Quality (WRF-CMAQ) regional model, Zhang et al. (2019) found higher monthly mean PM<sub>2.5</sub> concentrations. Aside from pollutant emissions, the causes of haze in China, the weather conditions and climate change also play a significant role in modulating haze formation, distribution, maintenance and change (Ding et al., 2009; Tai et al., 2012; Zhang et al., 2013). Yang et al. (2016) found that changes in meteorological parameters contributed 17 ( $\pm 14$ )% to the increasing trend in PM<sub>2.5</sub> concentration from 1985 to 2005. Dang and Liao (2019) found that severe winter haze days

40 showed large interannual variations in frequency and intensity, which were mainly driven by changes in meteorology. Winter haze- fog in northern China in recent years are related to weak winter circulation (Wu et al., 2014). Some studies have noted that the circulation in mid- and high latitude regions plays an important role in wind variations in northern China (Wang et al., 2016; Li et al., 2017; He et al., 2019). Zhao et al. (2013) and Zhang et al. (2013) showed that the weak East Asian winter monsoon (EAWM) is particularly unfavorable to the outward transport of aerosols in northern China, which results in

45 continuous strong haze in northern China. In addition, the stable weather conditions associated with the Siberian high pressure are also conducive to the accumulation and maintenance of haze (Zhang et al., 2016; Liu et al., 2017). Li et al. (2019) reported that the Eurasian teleconnection (EU) at 500 hPa is the most important pattern affecting haze- fog in northern China using singular value decomposition, and its fraction of variance is 45%. In the negative EU, there is a positive anomaly in geopotential height in Europe and East Asia and, a negative anomaly in Siberia at 500 hPa. As a result, the cold air mass from

50 the arctic is too weak to reach northern China (Ren et al., 2010; Zhai et al., 2016), which is not conducive to the dissipation of haze.

According to many studies, the North African-Asian (NAA) jet has an important impact on the Asian climate in winter (Syed

et al., 2006; Feldstein and Dayan, 2008; Wen et al., 2009; Ni et al., 2010; Li et al., 2013). On the decadal timescale, the strength of the jet is highly consistent with the frequency of cold air temperature extremes in China (Chen et al., 2013). The divergence in the upper troposphere induced by the subtropical westerly jet waveguide is important for spatially large and persistent winter rainfall in South China (Li and Sun, 2015; Ding and Li, 2017). Based on previous theoretical work, Xu et al. (2019) noted that the British-Baikal Corridor teleconnection on the polar front jet waveguide in Eurasia has an important impact on the climate of East Asia in summer. Zhang et al. (2019) found that the winter concurrent meridional shift in the East Asian jet streams is related to the east-ward propagating Rossby wave. Huang et al. (2019) further found that the concurrent change in the location of the subtropical and polar front jet in East Asia in winter has an important impact on the climate of East Asia. In addition, previous studies showed that as the teleconnection wave source location, the anomaly in atmosphere circulation related to sea surface temperature (SST) in the North Atlantic can significantly influence winter weather in the Northern Hemisphere (Wallace and Gutzler, 1981; Peng et al., 1995; Czaja and Frankignoul, 2002; Li and Betas, 2007), which can influence haze in China (Xiao et al., 2014; Gao and Chen, 2017). Chen et al. (2013) noted that the cold air activity was possibly associated with the development of the Siberian high pressure and a wave train from the North Atlantic. Yang et al. (2019) stated that the East Asian wind and temperature anomalies during boreal winter are determined by the combination of the two wave trains propagating along the subtropical jet and the polar front jet. The SST anomalies in the North Atlantic can induce a downstream Rossby wave train, resulting in anomalous circulations over the NCP, which are favorable for haze over central and south China (Feng et al., 2019; Wang et al., 2019).

In summary, [the Rossby waves within the East Asian upper westerly jet waveguides](#) has important influences on the East Asian climate. Previous research on the meteorological parameters influencing haze in the NCP has focused mainly on local meteorological conditions in the middle and lower troposphere, or only the correlation between haze in China and North Atlantic SST or other patterns, while studies about the specific mechanisms behind the influence of [large-scale](#) atmospheric circulations in the upper troposphere on haze, especially the combined effect of [the Rossby waves within two westerly jet waveguides](#), are rare. Given the above content, the objective of the present study is to determine whether the effects of [the Rossby waves within two westerly jet waveguides](#) on haze [were](#) significant in the NCP in November and December 2015 and, if so, to identify the principal mechanism behind the effects of [the Rossby waves within two westerly jet waveguides](#) on haze.

The structure of this paper is as follows: data and methodology used in this paper are described briefly in Section 2. Section 3 presents the haze event and describes major meteorological parameters and atmosphere circulation patterns during haze events. Section 4 demonstrates the influencing mechanisms of [the Rossby waves within two westerly jet waveguides](#) on haze events. Further discussions and conclusions of our findings are provided in Section 5.

## 2 Data and Methodology

### 2.1 Data

Visibility station data from the stations in the region (15-55°N, 105-135°E) in November and December 2015 were from the China Meteorological Administration (CMA). These data were recorded four times daily (02:00, 08:00, 14:00, and 20:00, local time (LCT)). The data were averaged monthly in this study.

The monthly mean and daily mean reanalysis data are from the National Centers for Environmental Prediction-National Center for Atmospheric Research (NCEP/NCAR) NCEP-DOE AMIP-II Reanalysis (R-2) dataset (Kanamitsu et al., 2002). The dataset covers a 39-yr period from 1979 to 2017, with a latitude-longitude spatial resolution of  $2.5^{\circ} \times 2.5^{\circ}$ , including the geopotential height, wind vector, relative humidity, air temperature, and omega data at each standard level from 10 hPa to 1000 hPa. The daily precipitation data from November to December 2015 are provided by the NASA/Goddard Space Flight Center (Huffman et al., 2014).

### 2.2 Methodology

Haze was defined as a day when the daily mean visibility and relative humidity were less than 10 km and 80%, respectively, and no rain, snow, sand and dust storms occurred in accordance with the standards set by the CMA (China Meteorological Administration, 2010).

Visibility station data were interpolated to the regular grid of  $0.5^{\circ} \times 0.5^{\circ}$  using [Cressman interpolation method \(Cressman, 1959\)](#). Cressman objective analysis adopts the method of successive corrections, which has been widely used in various climate diagnosis analysis and numerical simulation studies. The most important Cressman objective analysis is the determination of



100 the weight function  $W_{i,j}$  (Feng et al., 2004) (1-2):

$$W_{i,j} = \frac{R^2 - r_{i,j}^2}{R^2 + r_{i,j}^2} \quad r_{i,j}^2 < R, \quad (1)$$

$$W_{i,j} = 0 \quad r_{i,j}^2 > R, \quad (2)$$

Where  $R$  is the influence radius,  $r_{i,j}^2$  is the distance between two interpolation points,  $i$  and  $j$  are each interpolation point.  $R$  are 5, 4, 3 in this paper. Unit of  $R$  is degree.

105 
$$S_{i,j} = \frac{\sum_{k=1}^N W_{i,j}^k S_{obs}^k}{\sum_{k=1}^N W_{i,j}^k} \quad (3)$$

Where  $S_{i,j}$  is the interpolated value at point  $i, j$  and  $S_{obs}^k$  is station data.  $N$  is number of stations.

To analyze the propagation of anomalous Rossby waves, we calculated horizontal stationary wave activity flux based on monthly-mean data to show the propagation of wave energy using the method of Plumb (1985) (4):

$$F = p_0 \cos\phi \left( \frac{1}{2a^2 \cos^2\phi} \left[ \left( \frac{\partial\psi'}{\partial\lambda} \right)^2 - \psi' \frac{\partial^2\psi'}{\partial\lambda^2} \right] - \frac{1}{2a^2 \cos^2\phi} \left( \frac{\partial\psi'}{\partial\lambda} \frac{\partial\psi'}{\partial\phi} - \psi' \frac{\partial^2\psi'}{\partial\lambda\partial\phi} \right) \right), \quad (4)$$

110 Here,  $F$  is the horizontal stationary wave activity flux ( $\text{m}^{-2} \text{s}^{-2}$ ),  $p_0$  is pressure / (1000 hPa),  $\psi'$  is the perturbation stream function,  $a$  is Earth's radius,  $\phi$  is the latitude, and  $\lambda$  is the longitude. Geopotential anomalies calculated according to equation 10 will be used to compute perturbation stream-function.

The East Asian winter monsoon composite index defined by He and Zhou (2012) was used to characterize the East Asia winter monsoon. The formula is as follows (5-8):

115 
$$I_1 = \text{Norm}[\bar{p}_s(40^\circ \sim 60^\circ N, 80^\circ \sim 125^\circ E)] , \quad (5)$$

$$I_4^* = -1 \times I_4 = -1 \times \text{Norm}[\bar{h}_{500}(25^\circ \sim 45^\circ N, 110^\circ \sim 145^\circ E)] , \quad (6)$$

$$I_5 = \text{Norm}[\bar{u}_{300}(25^\circ \sim 40^\circ N, 80^\circ \sim 180^\circ E) - \bar{u}_{300}(45^\circ \sim 60^\circ N, 60^\circ \sim 160^\circ E)] , \quad (7)$$

$$EAWMII = \frac{I_1 + I_4^* + I_5}{3} , \quad (8)$$

$$\text{Norm}(x) = \frac{x - \text{mean}(x)}{n} , \quad (9)$$

120 Here, Norm represents standardization,  $x$  is a variable.  $n$  is the number of non-missing value, and  $\bar{p}_s$ ,  $\bar{h}_{500}$ , and  $\bar{u}_{300}$  are the mean sea level pressure, 500 hPa mean geopotential height and 300 hPa mean zonal wind over the region defined above,

respectively.

Please note that all the anomalies calculated in this paper were based on the climatological mean during the thirty-year period of 1981–2010. For example, the calculation procedure can be written as (10)

$$125 \quad hgt\_a_{Nov2015} = hgt_{Nov2015} - hgt\_m_{Nov \text{ during } 1981 \text{ to } 2010}, \quad (10)$$

Here,  $hgt\_a_{Nov2015}$ ,  $hgt_{Nov2015}$  and  $hgt\_m_{Nov \text{ during } 1981 \text{ to } 2010}$  represent the geopotential height anomaly in November 2015, the geopotential height in November 2015 and geopotential height mean over November 1981 to 2010.

### 3 Persistent haze events and associated weather patterns

Heavy haze occurred over the NCP in November and December 2015. The locations where the average monthly visibility was less than 10 km covered northern China and eastern China (Figure 1). The haze events were characterized by wide range, strong intensity and long duration, which was consistent with the analysis of Chang et al. (2016), Zhang et al. (2016) and Zhang et al. (2019). There were 22 haze days, accounting for more than 70% of the total days, in November and December 2015, respectively (Figure 2). In November, the mean monthly visibility over the NCP was 8.33 km with a minimal value of 4.14 km. A regional mean visibility of less than 10 km appeared on 4-16, 18-22 and 27-30, with minimal daily values of 5.16 km, 5.86 km and 4.14 km, respectively. Similarly, the mean monthly visibility in December over the NCP was 8.63 km with a minimal daily value of 2.62 km. The dates when the regional mean visibility was less than 10 km were 6-14, 19-24 and 28-31 December, with minimal daily values of 3.87 km, 2.62 km and 6.00 km, respectively.

To research the stability of the lower atmosphere, the vertical temperature difference (VTD) is expressed by the vertical difference in the temperature between 1000 hPa and 850 hPa (Liu et al., 2017), which is on average 4.5°C-7.5°C in the NCP. The value of the VTD was small so that the lower troposphere was relatively stable (Figure 3a). In addition, the vertical profiles of the temperature anomalies between 1000 hPa and 700 hPa show warm anomalies in the middle and lower troposphere and cold anomalies near the surface (Figure 3e), which further indicates that the atmosphere is relatively stable. When haze occurred, the mean monthly relative humidity (RH) in the NCP was less than 70% (Figure 3b), and the regional daily relative humidity was also relatively low (not shown). According to the haze identification conditions issued by the China

145 Meteorological Administration (2010), haze rather than haze- fog can be considered the main pollution event in November and December 2015. An RH of approximately 55-70% may promote the liquid phase reaction of aerosol particles. RH has an important influence on the hygroscopic growth of aerosol particles (Ma et al., 2014), which can promote the photochemical reaction of aerosol particles. Wu et al. (2019) found that the air over the NCP during the haze episode was humid, with an average simulated RH of approximately 71%.

150 The ground was mainly controlled by an anticyclone in November and December 2015 according to the ground wind field at 10 m. The NCP was in the center of the anticyclone, and the wind speed was very weak (Figure 3c). However, in the periphery of the NCP, the wind speed was relatively strong (Figure 3c). The horizontal wind speed exhibited a negative anomaly from the lower troposphere to the upper troposphere (Figure 3e). The 850 hPa wind field showed a northeast-southwest wind speed shear (Figure 3d), which corresponded to negative vorticity anomalies. The atmosphere was mainly composed of descending movement, so the stratification was relatively stable. According to Liu et al. (2017), the frequency of haze occurrence was 24.5% under low wind speed conditions at the ground and low stability over 1303 noncold wave days, accounting for the highest proportion of the four conditions (including low wind speed and low stability (20.4%), high wind speed and low stability (14.4%), and high wind speed and high stability (14.6%). In addition, compared with surface temperature, surface specific humidity, cloud fraction, precipitation rate, and upward flux ( $\text{kg s}^{-1}$ ) associated with the convergence of aerosols, the contributions of horizontal wind and the boundary layer height to  $\text{PM}_{2.5}$  concentration in eastern China in winter 1985-2005 were 37% and 25%, respectively (Yang et al., 2016). Therefore, wind speed and atmospheric stability play vital roles in haze formation during November and December in the NCP. From the 850 hPa wind vector, it can be found that there was an anticyclonic circulation in southern China. The southerly wind on the northwest side of the anticyclone circulation prevented the southward dispersion of pollutants over the NCP. At the same time, the anticyclone circulation weakened the EAWM in the NCP. According to the winter monsoon composite index defined by He et al. (2012), the EAWM index in November and December 2015 was -0.29 (not shown). The weak EAWM was beneficial to the occurrence and maintenance of haze.

165 Figure 4 shows the mean monthly circulation anomalies and the average jet positions in November and December 2015. At 200 hPa (Figure 4a), there was a clear northerly anomaly in western China and southerly anomaly in eastern China in the meridional wind within the mid-high latitude westerly jet. Within the subtropical westerly jet (Figure 4a, green contour line),

170 there existed a southerly/northerly wind wave train package which is similar to study of Ding et al. (2017) (Figure 4a). There were northerly wind anomalies in the Mediterranean region, southerly wind anomalies in the Arabian Peninsula, northerly wind anomalies in western China, and southerly wind anomalies in the Yellow and Bohai Sea of China. Hoskins et al. (1993) and Hsu et al. (1992) found that there are wave train in mid latitude upper troposphere of northern hemisphere. This was also similar to the teleconnection of the Northern Hemisphere Silk Road in summer proposed by Lu et al. (2002). There was a strong northerly anomaly over the European continent. The strong northerly wind led to the advection of cold air towards the Middle East and the Mediterranean Sea, which intruded into the entrance of the westerly jet stream and propagated eastward in the form of a wave train along the westerly jet stream. The centers of the southerly wind anomalies were located over the Arabian Peninsula and East Asia, and the centers of the northerly wind anomaly were located over the European continent and Central Asia. The northerly and southerly wind anomalies over the Asian continent resulted in anomalous circulation in southern China, with abnormal ascending movement on the eastern side of the cyclonic anomaly according to the value of divergence at 850 hPa (Figure 4c) and 200 hPa (Figure 4a) and the omega value at 500 hPa (Figure 4b). The NCP experienced an anticyclonic anomaly with abnormal descent. Atmospheric motion ascended over southern China and descended over the NCP to form a north-south circulation system from 20°N to 50°N at 112°E-120°E (Figure 4a, Figure 6). In addition, the NCP was located in the middle of the cyclonic and anticyclonic anomalies, with strong southerly winds at 850 hPa (Figure 4c), weakening the EAWM and favoring haze accumulation. Wallace and Gutzler (1981) pointed out the Eurasian Pattern (EU) is one of teleconnections at the 500 hPa in the northern hemisphere in the winter. The EU positive phase corresponds to the negative, positive and negative geopotential height anomalies at 500 hPa over Western Europe, Ural region and Japan, respectively. Otherwise, it is negative phase (Wallace and Gutzler, 1981). There was a negative phase of the EU at 500 hPa (Figure 4b): the negative geopotential height anomaly over Siberia weakened the Ural ridge, and the positive geopotential height anomaly over the Sea of Japan weakened the East Asian trough. According to Li et al. (2019), the direct effect of the EU negative phase is that the arctic cold air does not easily flow to East Asia, and the EAWM weakens. Thus, a negative EU may have an important impact on haze. Due to the anticyclonic anomaly in the lower troposphere over the Sea of Japan, the descending movement over the NCP stabilizes the atmosphere, creating an environment that is conducive to haze. In southern China, there was mainly ascending motion, with an anomalous southwesterly wind at 850 hPa (Figure 4c). The convergence

195 of southwesterly airflow was conducive to the occurrence of large-scale continuous precipitation over the southern China, as reported by Li and Sun (2015) and Ding and Li (2017). As shown in Figure 2, strong precipitation occurred in November and December 2015 in southern China (20°N-30°N, 100°E-120°E), i.e., during November 6-13, 14-17, and 18-21 and December 2-6, 7-10 and 21-23. The north-south circulation systems were consistent, which was implicative of a barotropic stable circulation structure triggering long-lasting of the haze events.

200 To more clearly depict the circulation in detail during the persistent haze events, the circulation field was composited by selecting haze events lasting at least three days with a mean daily visibility of less than 8 km (Figure 5). The periods are November 9-15, 19-21 and December 6-10, 19-25. The results during the severe haze events are in generally consistent with those of the monthly average. The locations of the centers of convergence and divergence at 850 hPa and 200 hPa and the anomalous meridional wind at 200 hPa are similar to the monthly averages (Figure 4a, 4c and Figure 5a, 5c), but the intensity of the anomalous meridional wind over the Mediterranean and East Asia seems to be stronger, and the strength of the divergence is enhanced as well. There is a relatively strong trough over the North Atlantic, a weak trough over the Ural Mountains and a trough over the North Pacific at 500 hPa. In addition, there was a weak Southern Branch trough over the southern Qinghai-Tibet Plateau and southern China. The subtropical high over the western Pacific was stronger and located in the west (Figure 5b). This circulation situation reduced the amount of cold air intruding into China and the winter monsoon also weakened. The Southern Branch trough provided rising conditions for precipitation over southern China. The southerly airflow on the west side of the subtropical high (Figure 5c; near 115°E) carried a large amount of water vapor originating from the South China Sea into southern China. In contrast, convergence of the southerly wind occurred over the NCP, leading to haze formation. Figure 6 shows composed sections of the actual values during the periods of November 9-15 and 19-21, December 6-10 and 19-25 in 2015. We can find there will be a local circulation in China when there is precipitation in South China (Figure 6). This local circulation includes the ascent in the South China and the descent in NCP.

Through the analysis above, we found that the main meteorological factors modulating the large-scale persistent haze in the NCP are wind vector and atmospheric stability. The anomalous southerly wind over the eastern coast of China weakens the winter monsoon, and the anticyclonic shear of the wind at 850 hPa in the NCP yields an increase in negative vorticity and the subsequent enhancement of atmospheric descent. In addition, the anomalous anticyclone over the Sea of Japan strengthens the

220 descending air motion and increases atmospheric stability. From the geopotential height anomaly at 200 hPa (not shown), 500 hPa (Figure 4b), 850 hPa (Figure 4c) and the tropospheric vertical motion (Figure 6), it can be seen that the upper and lower levels exhibit barotropic structures. The north-south anomaly of the meridional wind from west to east appears in the upper tropospheric subtropical westerly jet, which is similar to the Silk Road teleconnection proposed by Lu et al. (2002). The anticyclone anomaly over the NCP strengthens the descending motion, and the ascending motion related to upper divergence and lower convergence over southern China is strong. In addition, we find that the ascendant air in South China flows northward near 200hPa – 250hPa, and then descend in North China (figure 6a) when there is rainfall in South China and heavy haze in the NCP at the same period. The north-south circulation system is conducive to the maintenance of haze in the NCP, whereas large-scale precipitation occurred over southern China.

#### 4 Evolution of the Rossby waves within two westerly jet waveguides and principal mechanism analysis

230 To explore the influence on Rossby wave propagation along the subtropical westerly jet and associated influences on haze, the first leading EOF mode of the 200 hPa zonal and meridional winds within the domain 0-75°N, 0-160°E based on the average fields of November and December from 1979 to 2017 was calculated. The first mode of zonal wind represents the north-south movement of the subtropical jet (Figure 7a), following Hong et al. (2016). The variance explained by this mode is 25.3%. From the first modal time series, it can be seen that the exponent is positive in 2015, meaning that the location of the subtropical jet is south. The first mode of the meridional wind is a Rossby wave manifested by the north-south anomaly of the 200 hPa meridional wind, following Li et al. (2017). The variance explained by this mode is 23.4%. The first modal time series shows that the exponent has a negative index in 2015, with strong intensity (Figure 7c). The northerly wind anomaly appears in the Mediterranean region and the Indian Peninsula region, and the southerly wind anomaly appears in the Arabian Peninsula region, North China and the Yellow Sea.

240 To investigate the relationship between the position change in the jet and the Rossby waves, the time series of the 200hPa vector wind field and meridional wind are regressed onto the principal component time series of the first EOF of meridional wind and the first EOF of zonal wind in Figs 8 a and b, respectively. The results of the regression are very similar as shown in

Figure 8a and Figure 8b. That is, the position movement of the jet and the Rossby waves was closely related in winter, which is basically consistent with the results of Hong et al. (2016) on the relationship between the Silk Road teleconnection (summer) and the change in jet stream location.

To reveal the influence of the Rossby waves within jet waveguide on atmospheric circulation in the middle and lower troposphere, 500 hPa geopotential height anomalies and 850 hPa wind field anomalies were regressed onto the time series of the first EOF mode of meridional wind (Figure 9). The EU negative phase appears in the regressed geopotential height field. The two positive centers of the regression coefficients of the geopotential height anomaly are located over the Mediterranean Sea and the Sea of Japan. The positive geopotential height anomaly near the Sea of Japan weakens the East Asian trough, weakening the EAWM. In addition, the anticyclone anomaly also causes the southerly wind anomaly at 850 hPa over the eastern coast of China, further weakening the winter monsoon. The center of the negative geopotential height anomaly is located in Siberia, weakening the Ural ridge and weakening the Lower Siberian High and favoring haze formation. The regression coefficient of the wind field anomaly shows that there is a southerly anomaly over the NCP, and a southwesterly anomaly in South China. The southerly anomaly over the NCP tends to weaken the winter wind, while the southwesterly anomaly over South China carries water vapor from the Bay of Bengal and South China Sea to South China, providing favorable moisture conditions for precipitation in South China.

To further examine the mechanism behind the propagation of the Rossby waves, two-dimensional wave activity flux was calculated and generated according to the formula for the wave action flux defined by Plumb (1985). According to the definition, the wave activity flux reflects the sustained propagation of quasi stationary wave energy to the area of East Asia and West Pacific during this period when the Eurasian Continental trough and ridge is fixed (Plumb, 1985). Figure 10 shows that the European continent is the source of the Rossby wave. Rossby waves propagate into two pathways: a subtropical westerly jet and polar front jet. The propagation of the Rossby wave active flux to the downstream causes the circulation anomaly in the downstream region. The Rossby wave in the polar front jet was stronger than that in the subtropical westerly jet. The propagation of northerly Rossby wave to the downstream will cause the anomaly of the downstream circulation (Luo, 2005; Li et al., 2015; Li et al., 2019; Wang et al., 2019). Rossby waves in the polar front jet, named the EU, resulted in energy convergence over the Siberian area, leading to a negative geopotential height anomaly in this location, weakening the Ural

ridge and preventing cold air advection towards China. The remaining energy from the easterly propagation caused the positive geopotential height anomaly over the Sea of Japan, weakening the East Asian trough and inducing the southerly wind anomaly over the eastern coast of China. The southern branch of the Rossby wave propagated within the subtropical westerly jet that passed over the Arabian Peninsula, India and other places. Almost all of its energy dispersing from the upstream was converged within South China, resulting in anomalous circulation, conducive to a large amount of heavy rainfall in South China. Ding et al. (2017) also found dispersion of Rossby wave energy enhanced anomalous low over the Indo-China Peninsula and high over eastern China, and maintenance of the strong Rossby waveguide caused the large spatial persistent heavy rainfall. Wang et al. (2019) found that the enhanced significant rainfall heating may greatly intensify the ascending motion over the western North Pacific sector and the adjacent region, resulting in subsidence over the Beijing–Tianjin–Hebei region and Northeast Asia via an anomalous local meridional cell. The latent heat released by precipitation as a heat source strengthened the abnormally ascending motion in South China, which further strengthened the anticyclone anomaly in the NCP. The wave action flux was obviously enhanced in the Sea of Japan area, which may be due to the concurrent effect of two waves superposing in this area. Thus, the energy from the southern branch of the Rossby wave was very weak over the Sea of Japan, but the anticyclone anomaly over the Sea of Japan was still very strong.

Based on the analysis above, a diagram of the Rossby waves within the waveguide of the westerly jet affecting haze events in the NCP is drawn (Figure 11, Figure 12). The Rossby wave originated from the Mediterranean region (Li and Sun, 2015) and propagated eastward along the westerly jet, resulting in an anomalous anticyclone over the Sea of Japan and strengthening descending air motion over the NCP. In addition, there was a southerly wind anomaly at 850 hPa over the eastern coastal areas of China, which weakened the winter monsoon (Figure 12). Both of these features are conducive to haze accumulation. In addition, the Rossby waves also caused a strong abnormal upward movement over South China, which combined with the rich water vapor carried by the southwesterly airflow resulted in large-scale continuous rainfall (Figure 11, Figure 12). The latent heat released by precipitation as a heat source strengthened the abnormal ascending motion over South China, which further helped to maintain the sinking motion in the NCP. A local circulation in the southern and northern parts of China was formed (Figure 12): the air rises in the south and subsides in the north, facilitating the intensification of the descending air motion in the NCP and the persistence of haze.



## 5 Discussions and conclusions

A wide range of haze pollution occurred in the NCP in November and December 2015. The meteorological factors, climatic system and mechanisms affecting haze were elucidated in this study. Haze was mainly modulated by the weakening of the EAWM and the strengthening of descending air in the NCP. [The Rossby waves within two westerly jet waveguides](#) originating from the Mediterranean region was the main mode fostering the atmospheric circulation patterns tightly associated with haze formation in the NCP.

The Rossby wave propagated easterly primarily along two pathways. The northern path seemed to yield positive geopotential height anomalies in the troposphere over the Sea of Japan and the NCP, strengthening the descending air movement over the NCP. In addition, it weakened the East Asia trough and Ural ridge, resulting in the southerly wind anomaly at 850 hPa over the eastern coast of China, weakening the winter monsoon, and leading to subsequent haze accumulation. Due to the influence of the southern path [of the Rossby wave](#), there was abnormal upward air movement over South China, which combined with a large amount of water vapor carried by the 850 hPa anticyclone circulation over South China, provided favorable conditions for continuous rainfall in South China. As a heat source, the latent heat of condensation released by precipitation, further strengthened abnormal upward movement in South China, favorable for the subsidence and haze formation in the NCP.

[The Rossby waves within two westerly jet waveguides](#) may be the main mechanism leading to the occurrence and maintenance of large-scale haze in the NCP in November and December 2015. The linear regression coefficient of PC1 (bar) of the leading EOF mode for the 200 hPa meridional wind anomaly onto the mean visibility anomaly in November and December is approximately [0.38 km](#) from 1980 to 2015 (Figure 13). The location of the EU mentioned above is slightly different from that of the EU defined by predecessors. To describe the EU more accurately in this study, a new EU index (EUI) was defined according to the definition of the EUI of Wallace and Gutzler (1981).

$$\text{EUI} = -1/4 \times \text{hgt500\_ano}(40^\circ\text{N}, 0^\circ) + 1/2 \times \text{hgt500\_ano}(50^\circ\text{N}, 50^\circ\text{E}) - 1/4 \times \text{hgt500\_ano}(40^\circ\text{N}, 140^\circ\text{E})$$

Here, hgt500\_ano is the mean geopotential height anomaly at 500 hPa in November and December.

The linear correlation coefficient of the PC1 of the leading EOF mode for the 200 hPa meridional wind anomaly and EUI is approximately 0.92, which further shows that the combined effect of [the Rossby waves within two westerly jet waveguides](#)

may have an important influence on heavy haze in the NCP. In addition to 2015, [the two waves](#) also existed in 1989, 1994, 1996, 2004, 2006, and 2011. The visibility anomaly in the NCP in these years was negative. However, [the Rossby waves within two westerly jet waveguides](#) were also strong in 1982, 1986, 1988, 1991, and 1992, and the visibility anomaly in the NCP was positive (Figure 13). In addition, compared to [the waves](#) in 2015, [the Rossby waves](#) were weak or out of phase in 2000, 2002, 2003, 2007, 2013, and 2014, while the visibility anomaly in the NCP was negative. This means that under similar pollutant emission conditions, the large-scale circulation conditions that cause air pollution may take on diversified modes. This paper mainly focused the haze in November and December 2015; therefore, the robustness of the mechanism may be further verified if other haze events can be evaluated in future studies. We can understand the complexity behind the climatic causes of severe air pollution from some existing studies. For example, the combined effects of the negative North Atlantic Oscillation (NAO) and El Niño worsened air conditions over central and south China in the winters of 2000 and 2003 (Feng et al., 2019). The autumnal increased number of haze days in 2013 and 2014 was closely associated with simultaneous sea surface warming in the western North Pacific sector and the North Atlantic subtropical sector (Wang et al., 2019).

### **Acknowledgements**

This study was supported by the National Natural Science Foundation of China (Grant No. 41675146) and Fundamental Research Funds for the Central Universities (Grant No. 201941006). All authors would like to express their great thanks to the China Meteorological Administration (<http://data.cma.cn/>), NCEP/NCAR (<https://www.esrl.noaa.gov/psd/data/gridded/>), and NASA (<https://pmm.nasa.gov/data-access/downloads/gpm>) for supplying the research data. They are also very grateful for anonymous reviewers for their kind efforts that improved the quality of this manuscript significantly.

### **Data availability**

The visibility observational data is available at the China Meteorological Administration (<http://data.cma.cn/>). The reanalysis dataset is available at NCEP/NCAR (<https://www.esrl.noaa.gov/psd/data/gridded/>). The precipitation data is available at NASA (<https://pmm.nasa.gov/data-access/downloads/gpm>).

340 **Author contribution**

XA, LS, CL and JL designed the study. LS and YG acquisitioned the funding. LS obtained observation data. XA and QL dealt with the visibility observational data. XA downloaded, analyzed the reanalysis data and prepared all figures. XA led the writing with the help of LS, QL and YG. All the authors discussed the results and commented on the paper.

**Competing interests**

345 The authors declare no conflicts of interest.

**Financial support**

This study was supported by the National Natural Science Foundation of China (Grant No. 41675146) and Fundamental Research Funds for the Central Universities (Grant No. 201941006).

**References**

350 Chang, L. Y., Xu, J. M., Tie, X. X., and Wu, J. B.: Impact of the 2015 El Nino event on winter air quality in China, *Sci. Rep.*, 6, 34275, doi:10.1038/srep34275, 2016.

Chen, H. S., Liu, L., and Zhu, Y. J.: Possible linkage between winter extreme low temperature events over China and synoptic-scale transient wave activity, *Sci. China Ser.*, 56, 1266-1280, doi:10.1007/s11430-012-4442-z, 2013.

China Meteorological Administration.: QXT 113-2010 Observation and forecasting levels of haze (in Chinese), 1-1, China Meteorol. Press, Beijing, China, 2013.

Cressman, G. P.: An operational objective analysis system, *Mon. Wea. Rev.*, 87, 367-374, 1959.

Czaja, A. and Frankignoul, C.: Observed Impact of Atlantic SST Anomalies on the North Atlantic Oscillation, *J. Clim.*, 15,

- 606-623, doi:10.1175/1520-0442(2002)0152.0.CO;2, 2002.
- Ding, F. and Li, C.: Subtropical westerly jet waveguide and winter persistent heavy rainfall in south China, *J. Geophys. Res. Atmos.*, 122, 7385-7400, doi:10.1002/2017JD026530, 2017.
- 360 Ding, Y. H., Li, Q. P., Liu, Y. J., Zhang, L., Song, Y. F., and Zhang, J.: Atmospheric Aerosols, Air Pollution and Climate Change, *Meteorological Monthly*, 35, 3-15 (in Chinese), 2009.
- Feldstein, S. B. and Dayan, U.: Circumglobal teleconnections and wave packets associated with Israeli winter precipitation, *Quart. J. Roy. Meteor. Soc.*, 134, 455-467, doi:10.1002/qj.225, 2008.
- 365 Feng, J., Li, J. P., Liao, H., and Zhu, J. L.: Simulated coordinated impacts of the previous autumn North Atlantic Oscillation (NAO) and winter El Niño on winter aerosol concentrations over eastern China, *Atmos. Chem. Phys.*, 19, 10787–10800, doi:10.5194/acp-19-10787-2019, 2019.
- Feng, J. M., Zhao, T. B., and Zhang, Y. J.: Intercomparison of Spatial Interpolation Based on Observed Precipitation Data, *Climatic Environ. Res.*, 02, 261-277 (in Chinese), 2014.
- 370 Gao, Y. and Chen, D.: A dark October in Beijing 2016, *Atmospheric and Oceanic Science Letters*, 10:3, 206-213, doi:10.1080/16742834.2017.1293473, 2017.
- Hoskins, B. J. and Ambrizzi, T.: Rossby wave propagation on a realistic longitudinally varying flow, *J. Atmos. Sci.* 50, 1661–1671, doi :10.1175/1520-0469(1993)050<1661:RWPOAR>2.0.CO;2, 1993.
- Hsu, H. H. and Lin, S. H.: Global teleconnections in the 250-mb streamfunction field during the in the geopotential height field during the Northern Hemisphere winter, *Mon. Wea. Rev.*, 120, 1169–1190, doi:10.1175/1520-0493(1992)120<1169:GTITMS>2.0.CO;2, 1992.
- 375 He, C., Liu, R., Wang, X. M., Liu, S. C., Zhou, T. J., and Liao, W. H.: How does El Niño-Southern Oscillation modulate the interannual variability of winter haze days over eastern China? *Sci. Total Environ.*, 651, 1892-1902, doi:10.1016/j.scitotenv.2018.10.100, 2019.
- 380 He, S. P. and Wang, H. J.: An integrated East Asian winter monsoon index and its inter-annual variability, *Chinese Journal of Atmospheric Sciences*, 36(3), 523-538 (in Chinese), 2012.
- Hong, X. and Lu, R.: The meridional displacement of the summer Asian jet, Silk Road Pattern, and tropical SST anomalies, *J.*

- Clim., 29, 3753-3766, doi:10.1175/JCLI-D-15-0541.1, in press, 2016.
- Huang, D., Dai, A., Yang, B., Yan, P., Zhu, J., and Zhang, Y.: Contributions of Different Combinations of the IPO and AMO to  
385 Recent Changes in Winter East Asian Jets, *J. Clim.*, 32, 1607-626, doi:10.1175/JCLI-D-18-0218.1, 2019.
- Huffman, G., Bolvin, D., Braithwaite, D., Hsu, K., Joyce, R., and Xie, P.: Integrated Multi-satellite Retrievals for GPM  
(IMERG), version 4.4. NASA's Precipitation Processing Center, accessed 09 June, 2019, 2014.
- Kanamitsu, M., Ebisuzaki, W., Woollen, J., Yang, S. -K., Hnilo, J.J., Fiorino, M., and Potter, G. L.: NCEP-DOE AMIP-II  
Reanalysis (R-2), *Bulletin of the American Meteorological Society*, Nov 2002, 1631-1643, 2002.
- 390 Li, C. and Sun, J. L.: Role of the subtropical westerly jet waveguide in a southern China heavy rainstorm in December 2013,  
*Adv. Atmos. Sci.*, 32, 601-612, doi:10.1007/s00376-014-4099-y, 2015.
- Li, C. F., Chen, W., Hong, X. W., and Lu, R. Y.: Why was the strengthening of rainfall in summer over the Yangtze River valley  
in 2016 less pronounced than that in 1998 under similar preceding El Nino events? Role of midlatitude circulation in August,  
*Adv. Atmos. Sci.*, 34, 1290-1300, doi:10.1007/s00376-017-7003-8, 2017.
- 395 Li, J., Sun, C., and Jin, F. F.: NAO implicated as a predictor of Northern Hemisphere mean temperature multi-decadal  
variability, *Geophys. Res. Lett.*, 40, 5497- 5502, doi:10.1002/2013GL057877, 2013.
- Li, S., Han, Z., and Chen. H.: A comparison of the effects of inter-annual Arctic sea ice loss and ENSO on winter haze days:  
observational analyses and AGCM simulations, *J. Meteor. Res.*, 31, 820-833, doi:10.1007/s13351-017-7017-2, 2017.
- Li, S. L. and Bates, G.: Influence of the Atlantic Multidecadal Oscillation (AMO) on the winter climate of East China, *Adv.*  
400 *Atmos. Sci.*, 24, 126–135, doi:10.1007/s00376-007-0126-6, 2007.
- Li, Y., Sheng, L. F., Li, C., and Wang, Y. H.: Impact of the Eurasian Teleconnection on the Interannual Variability of Haze-Fog  
in Northern China in January, *Atmosphere*, 10, 113, doi:10.3390/atmos10030113, 2019.
- Liu, Q., Sheng, L., Cao, Z., Diao, Y., Wang, W., and Zhou, Y.: Dual effects of the winter monsoon on haze-fog variations in  
eastern China, *J. Geophys. Res. Atmos.*, 122, 5857-5869, doi:10.1002/2016JD026296, 2017.
- 405 Lu, R. Y., Jai, Ho. Oh, and Baek, Jo. Kim.: A teleconnection pattern in upperlevel meridional wind over the North African and  
Eurasian continent in summer, *Tellus A: Dynamic Meteorology and Oceanography*, 54, 44-55, doi:10.3402/tellusa.v54i1.12122,  
2002.

Luo, D., 2005: A barotropic envelope Rossby soliton model for block-eddy interaction. Part II: Role of westward-traveling planetary waves, *J. Atmos. Sci.*, 62, 22-40, doi.org/10.1175/3347.1

410 Ma, N., Zhao, C. S., Chen, J., Xu, W. Y., Yan, P., and Zhou, X. J.: A novel method for distinguishing fog and haze based on PM<sub>2.5</sub>, visibility, and relative humidity, *Science China: Earth Sciences*, 57, 2156-2164, doi:10.1007/s11430-014-4885-5, 2014.

Ni, D.-H., Sun, Z.-B., Li, Z.-X., Zeng, G., and Deng, W.-T.: Relation of Middle East jet stream and China climate anomaly in winter, (in Chinese) *Scientia Meteor. Sinica*, 30, 301-307, 2010.

415 Peng, S., Mysak, L. A., Derome, J., Ritchie, H., and Dugas, B.: The Differences between Early and Midwinter Atmospheric Responses to Sea Surface Temperature Anomalies in the Northwest Atlantic, *J. Clim.*, 8, 137-157, 1995.

Plumb, R.A.: On the three-dimensional propagation of stationary waves, *J. Atmos. Sci.*, 42, 217-229, doi:10.1175/1520-0469(1985)042<0217:OTTDPO>2.0.CO;2, 1985.

420 Ren, X. J., Yang, X. Q., Zhou, T. J., and Fang, J. B.: Diagnostic comparison of the East Asian subtropical jet and polar-front jet: Large-scale characteristics and transient eddy activities, *Acta Meteor. Sinica*, 68, 1-11, doi:10.1007/s13351-011-0002-2, 2010.

Smagorinsky, J.: The dynamical influence of largescale heat sources and sinks on quasi-stationary mean motions of the atmosphere, *Quart J. Roy. Meteor. Soc.*, 79, 342-366, 1953.

425 Syed, F. S., Giorgi, F., Pal, J. S., and King, M. P.: Effect of remote forcings on the winter precipitation of central southwest Asia Part 1: Observations, *Theor. Appl. Climatol.*, 86, 147-160, doi:10.1007/s00704-005-0217-1, 2006.

Tai, A. P. K., Mickley, L. J., Jacob, D. J., Leibensperger, E. M., Zhang, L., Fisher, J. A., and Pye, H. O. T.: Meteorological modes of variability for fine particulate matter (PM<sub>2.5</sub>) air quality in the United States: implications for PM<sub>2.5</sub> sensitivity to climate change, *Atmos. Chem. Phys.*, 12, 3131-3145, doi:10.5194/acp-12-3131-2012, 2012.

430 Wallace, J. M. and Gutzler, D. S.: Teleconnections in the geopotential height field during the Northern Hemisphere winter, *Mon. Wea. Rev.*, 109, 784-812, doi:10.1175/1520-0493(1981)109<0784:TITGHF>2.0.CO;2, 1981.

Wang, H. J. and Chen, H. P.: Understanding the recent trend of haze pollution in eastern China: roles of climate change, *Atmos. Chem. Phys.*, 16, 4205-4211, doi:10.5194/acp-16-4205-2016, 2016.

- 435 Wang, J., Zhu, Z., Qi, L., Zhao, Q., He, J., and Wang, J. X. L.: Two pathways of how remote SST anomalies drive the interannual variability of autumnal haze days in the Beijing–Tianjin–Hebei region, China, *Atmos. Chem. Phys.*, 19, 1521-1535, doi:10.5194/acp-19-1521-2019, 2019.
- Wang, L., Chen, W., and Huang, R.: Interdecadal modulation of PDO on the impact of ENSO on the East Asian winter monsoon, *Geophys. Res. Lett.*, 35(20), L20702, doi:10.1029/2008GL035287, 2008b.
- Wen, M., Yang, S., Kumar, A., and Zhang, P. Q.: An analysis of the Large-Scale climate anomalies associated with the snowstorms affecting China in January 2008, *Mon. Wea. Rev.*, 137, 1111-1131, doi:10.1175/2008MWR2638.1, 2009.
- 440 [Wu, D., Wu, X. J., Zhu, X. X.: Fog and Haze \(in Chinese\). Beijing: China Meteorological Press, 198, 2009.](#)
- Wu, R. G. and Wang, B.: Interannual variability of summer monsoon onset over the western North Pacific and the underlying processes, *J. Clim.*, 13, 2483-2501, doi:10.1175/15200442(2000)013<2483:IVOSMO>2.0.CO;2, 2001.
- Xiao, D., Li, Y., Fan, S. J., Zhang, R. H., Sun, J. R., and Wang, Y.: Plausible influence of Atlantic Ocean SST anomalies on winter haze in China, *Theor. Appl. Climatol.*, 122, 249-257, doi:10.1007/s00704-014-1297-6, 2014.
- 445 Xu, P., Wang, L., and Chen, W.: The British Baikal Corridor: A Teleconnection Pattern along the Summer time Polar Front Jet over Eurasia, *J. Clim.*, 32, 877-896, doi:10.1175/JCLI-D-18-0343, 2019.
- Yang, J., Wu, R., and Song, L.: Individual and combined impacts of two Eurasian wave trains on intra-seasonal East Asian winter monsoon variability, *J. Geophys. Res. Atmos.*, 124, 4530-4548, doi:10.1029/2018JD029953, 2019.
- 450 Yang, Y., Liao, H., and Lou, S.: Increase in winter haze over eastern China in recent decades: Roles of variations in meteorological parameters and anthropogenic emissions, *J. Geophys. Res. Atmos.*, 121, 13050-13065, doi:10.1002/2016JD025136, 2016.
- Zhai, P. M., Yu, R., Guo, Y. J., Li, Q. X., Ren, X. J., Wang, Y. Q., Xu, W. H., Liu, Y. J., and Ding, Y. H.: The strong El Niño of 2015/16 and its dominant impacts on global and China's climate, *J. Meteor. Res.*, 30, 283-297, doi: 10.1007/s13351-016-6101-3, 2016.
- 455 Zhang, G., Gao, Y., Cai, W. J., , Ruby Leung, L., Wang, S. X., Zhang, B., Wang, M. H., Shan, H. Y., Yao, X. H., and Gao, H. W.: Seesaw haze pollution in North China modulated by the sub-seasonal variability of atmospheric circulation, *Atmos. Chem. Phys.*, 19, 565-576, doi:10.5194/acp-19-565-2019, 2019.

Zhang, L. Y., Lu, X. B., Yang, L. L., Ding, F., Zhu, Z. F., and Rui, D. M.: Study on the Effects of the Strong El Nino Event on Air Quality of Eastern China in Winter, *The Administration and Technique of Environmental Monitoring*, 28, 23-27, 2016.

460 Zhang, X. Y., Sun, J. Y., Wang, Y. Q., Li, W. J., Zhang, Q., Wang, W. G., Quan, J. N., Cao, G. L., Wang, J. Z., Yang, Y. Q., and Zhang, Y. M.: Factors contributing to haze and fog in China, *Chin. Sci. Bull (Chin Ver)*, 58, 1178-1187 (in Chinese), 2013.

Zhang, Y., Yan, P., Liao, Z., Huang, D., and Zhang, Y.: The Winter Concurrent Meridional Shift of the East Asian Jet Streams and the Associated Thermal Conditions, *J. Clim.*, 32, 2075-2088, doi:10.1175/JCLI-D-18-0085.1, 2019.

Zhang, Z., Zhang, X., Gong, D., Kim, S.-J., Mao, R., and Zhao, X.: Possible influence of atmospheric circulations on winter haze pollution in the Beijing–Tianjin–Hebei region, northern China, *Atmos. Chem. Phys.*, 16, 561-571, doi:10.5194/acp-16-561-2016, 2016.

465 Zhao, X. J., Zhao, P. S., Xu, J., Meng, W., Pu, W. W., Dong, F., He, D., and Shi, Q. F.: Analysis of a winter regional haze event and its formation mechanism in the North China Plain, *Atmos. Chem. Phys.*, 13, 5685-5696, doi:10.5194/acp-13-5685-2013, 2013.

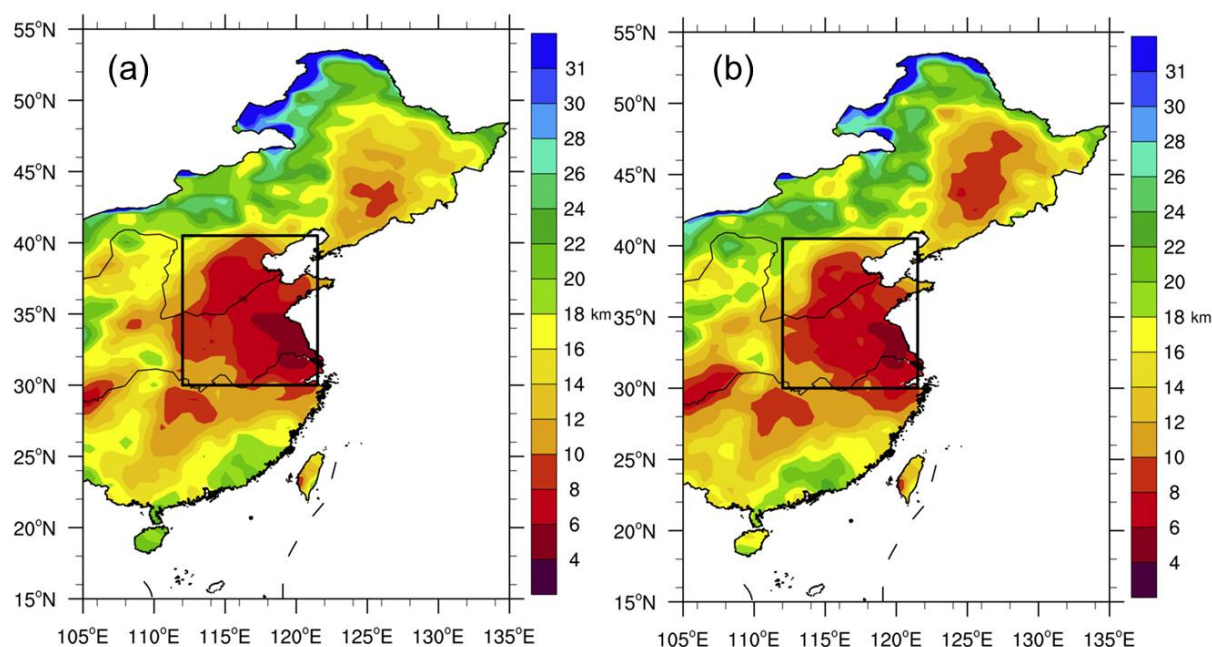

470

**Figure 1: Spatial distribution of monthly mean visibility (unit: km, shading) in (a) November and (b) December 2015.**

**The black box indicates the NCP (30°N-40.5°N, 112°E-121.5°E). Shading indicates the value of visibility.**



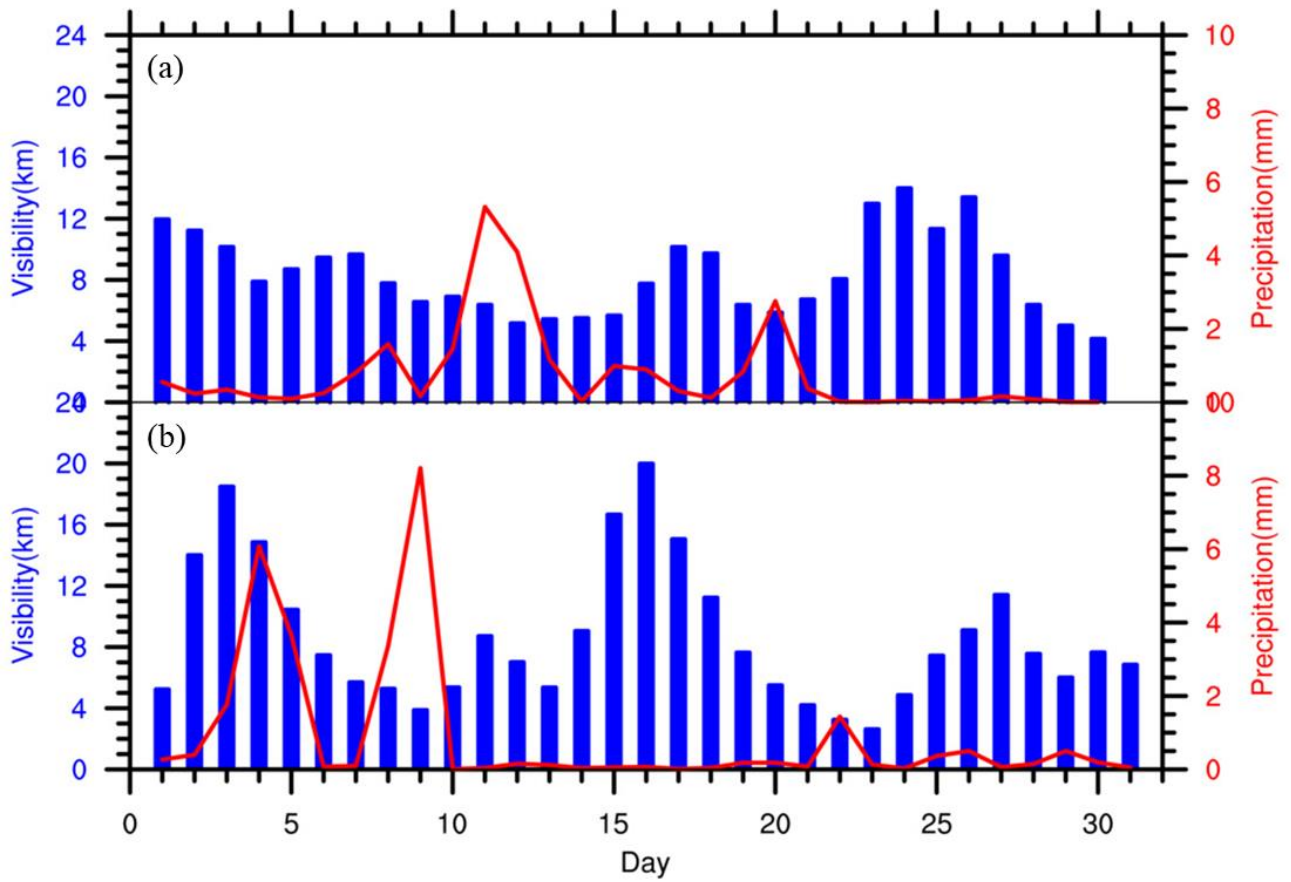

Figure 2: Variations in the regional mean daily visibility (bars; unit: km) is obtained by calculating the average value of all stations data in the NCP (30°N-40.5°N, 112°E-121.5°E) and the regional mean daily precipitation (lines; unit: mm day<sup>-1</sup>) in southern China (20°N-30°N, 100°E-120°E) (a) in November and (b) in December 2015.

475

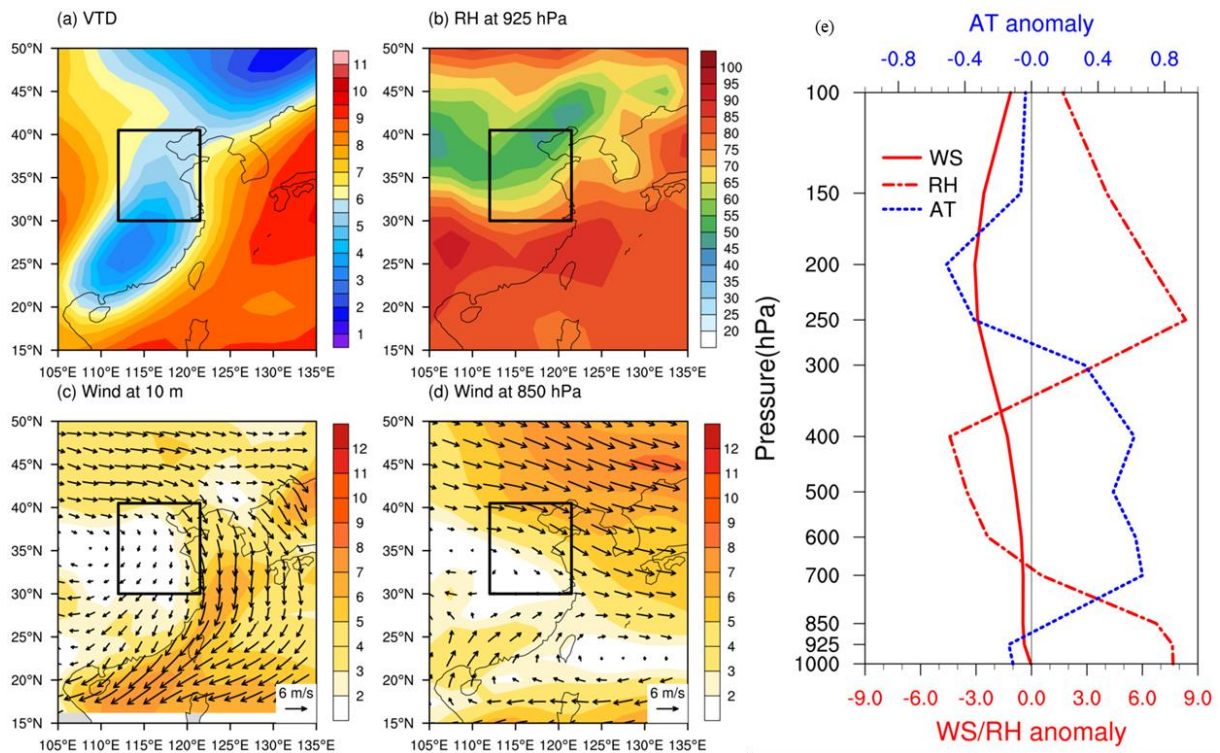

Figure 3: Spatial distribution of average over November and December 2015: the vertical temperature difference between 1000hPa and 850hPa (unit: °C; Figure 3a); relative humidity at 925 hPa (unit: %; Figure 3b); wind vector (unit:  $\text{m s}^{-1}$ ) at 10 m (Figure 3c) and 850hPa (Figure 3d) in NCP, with shading indicating the wind speed in the appropriate level. Vertical distribution of anomalies averaged over November and December 2015: air temperature (AT) (blue dashed line), horizontal wind speed (WS) (red solid line) and relative humidity (RH) (red dash-dotted line) in NCP (Figure 3e).

480

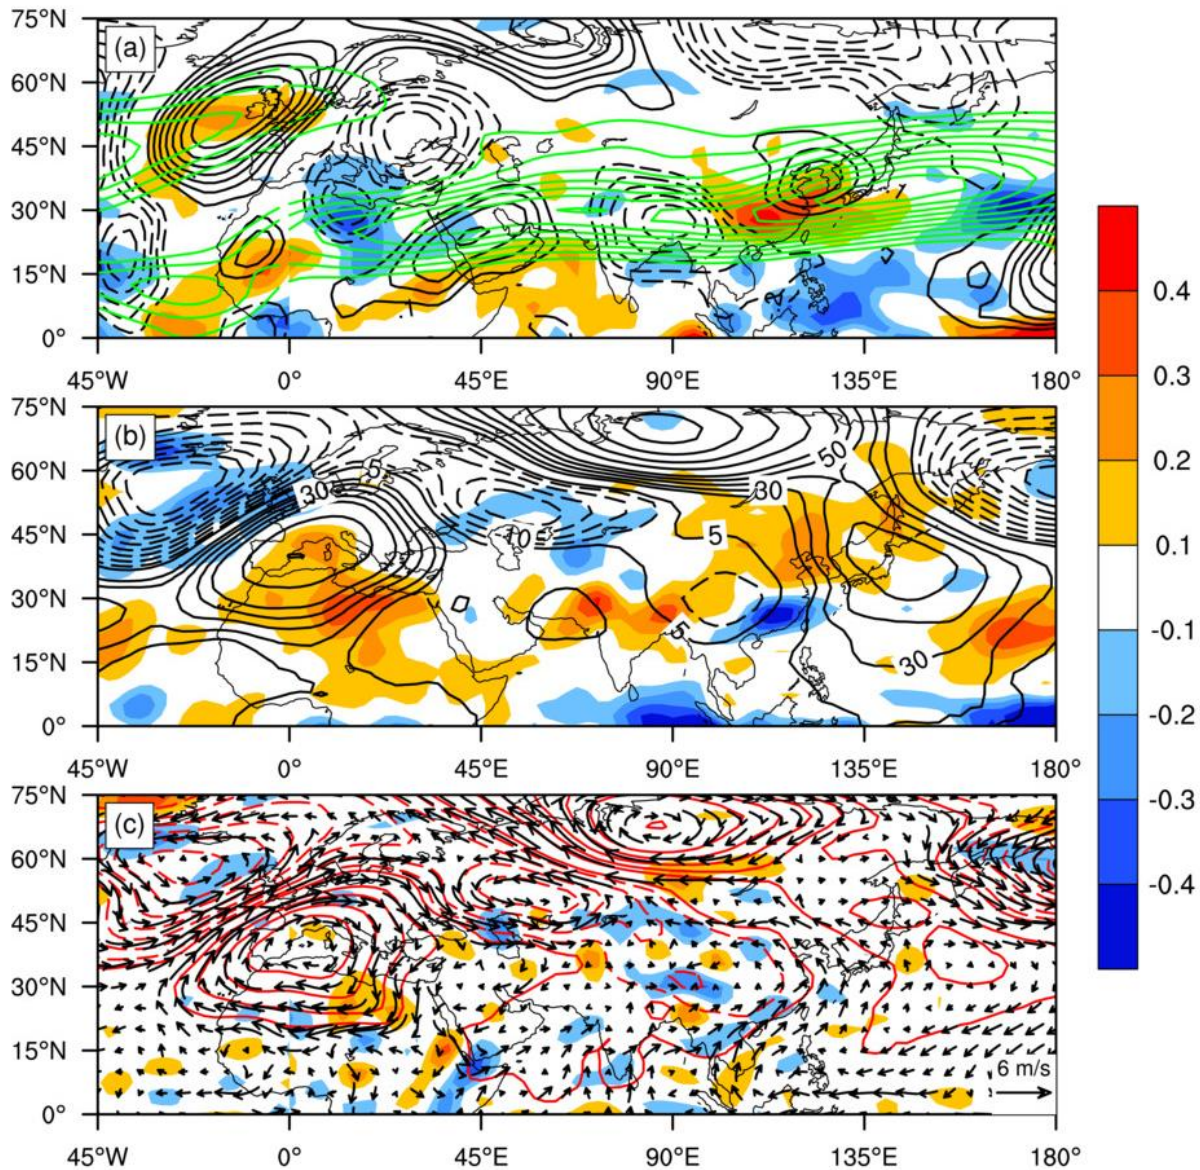

485 **Figure 4: Westerly jet and anomalous weather maps in November and December 2015:** (a) meridional wind (black contours, CI (contour interval) =  $1 \text{ m s}^{-1}$ , solid (dashed) lines represent southerly (northerly) wind anomaly), divergence (shading,  $10^{-5} \text{ m s}^{-1}$ ) and westerly jet (green line) (zonal mean wind, CI  $> 30 \text{ m s}^{-1}$ ) at 200 hPa; (b) geopotential height (black contours, CI = 10 gpm (geopotential meters), solid (dashed) lines represent positive (negative) geopotential height anomaly) and vertical velocity (shading,  $10^{-2} \text{ Pa s}^{-1}$ ); negative(positive) values represent ascent

490 (descent) at 500 hPa; (c) geopotential height (red contours, CI = 10 gpm), divergence (shading,  $10^{-5} \text{ m s}^{-1}$ ) and wind  
 vector (vector,  $\text{m s}^{-1}$ ) at 850 hPa. The variables shown in figure 4 are anomalies but the zonal wind is absolute (green  
 line).

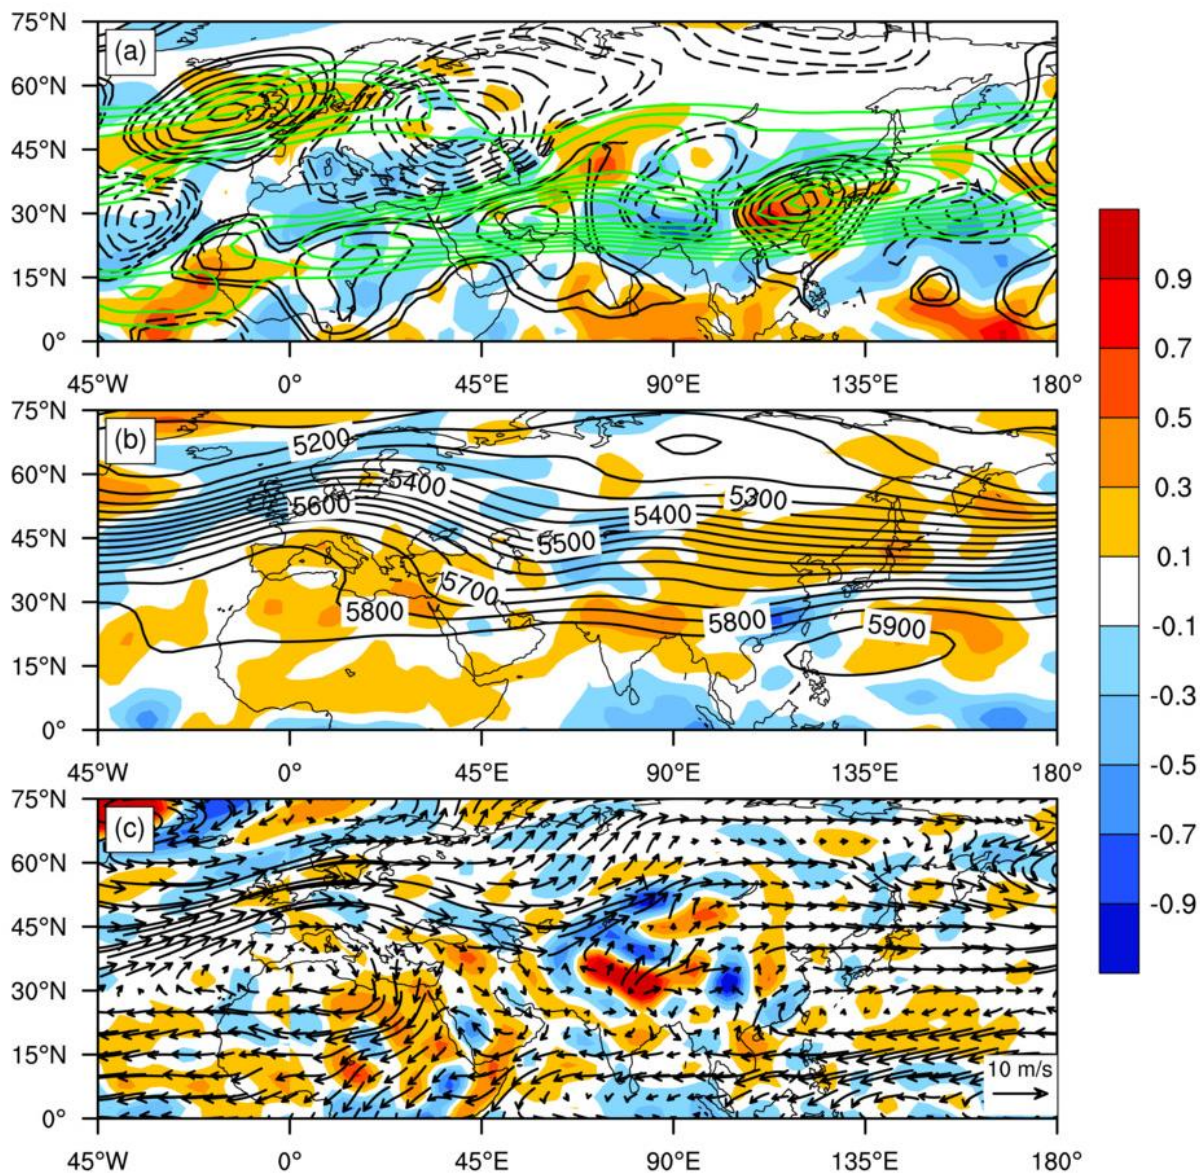

Figure 5: The same as Figure 4 but a composite of non-anomalous weather maps during the periods of November 9-15

495 and 19-21, December 6-10 and 19-25 in 2015: (a) meridional wind (black contours, CI (contour interval) =  $1 \text{ m s}^{-1}$ ,

solid (dashed) lines represent southerly (northerly) wind), divergence (shading,  $10^{-5} \text{ m s}^{-1}$ ) and westerly jet (green line) (zonal mean wind,  $\text{CI} > 30 \text{ m s}^{-1}$ ) at 200 hPa; (b) geopotential height (black contours,  $\text{CI} = 50 \text{ gpm}$ ) and vertical velocity (shading,  $10^{-2} \text{ Pa s}^{-1}$ ); negative(positive) values represent ascent (descent) at 500 hPa; (c) divergence (shading,  $10^{-5} \text{ m s}^{-1}$ ) and wind vector (vector,  $\text{m s}^{-1}$ ) at 850 hPa.

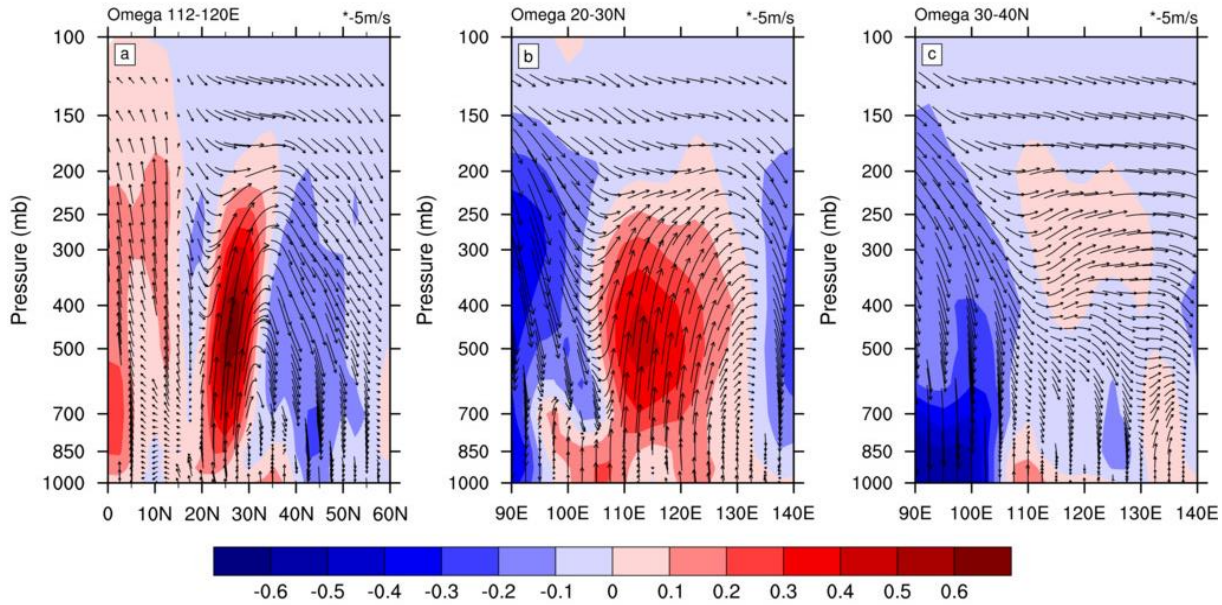

500

Figure 6: Composed sections of the actual values during the periods of November 9-15 and 19-21, December 6-10 and 19-25 in 2015: latitude-height sections with average longitude in  $112^{\circ}\text{E}$ - $120^{\circ}\text{E}$  of vertical velocity (shading, unit:  $-5 \text{ m s}^{-1}$ ) and wind vector ( $u$  and  $\omega$ ) (a); longitude-height sections with average latitude in  $20^{\circ}\text{N}$ - $30^{\circ}\text{N}$  (b) and in  $30^{\circ}\text{N}$ - $40^{\circ}\text{N}$  (c) of vertical velocity (shading, unit:  $-5 \text{ m s}^{-1}$ ) and wind vector ( $u$  and  $\omega$ ).

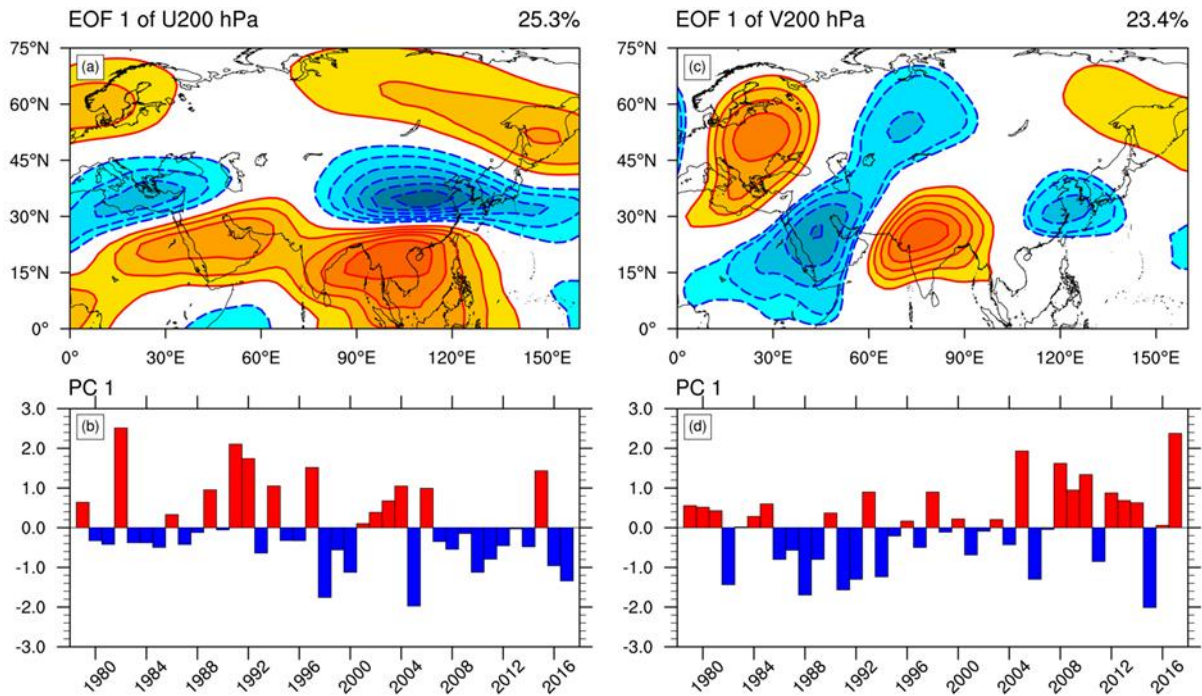

505

Figure 7: The (a) spatial distribution and (b) its principal component (PC) of the leading EOF mode for 200 hPa zonal wind anomaly within the domain 0-75°N, 0-160°E in November and December 1979-2017, where the solid (dashed) lines represent westerly (easterly) winds. Contour interval is  $0.01 \text{ m s}^{-1}$ ; (c) and (d) same as (a) and (b) but for meridional wind within the domain 0-75°N, 0-160°E, where solid (dashed) lines represents southerly (northerly) winds.

510

The percentage values in the upper-right corners of (a) and (c) show the percentage variance explained by this mode.

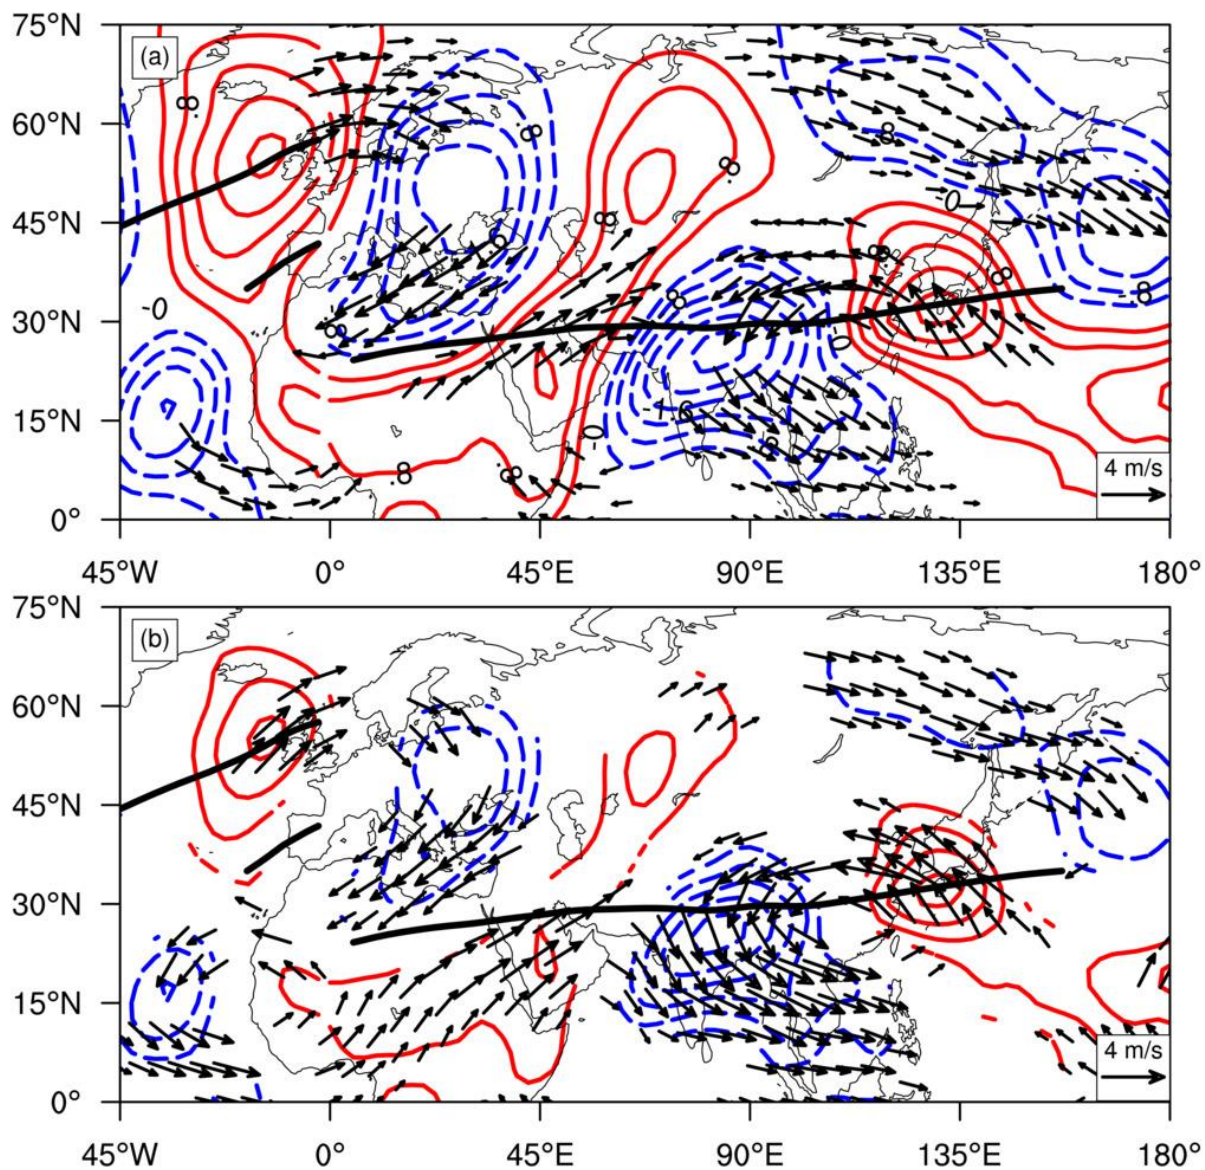

Figure 8: The 200 hPa horizontal wind anomalies (vector,  $\text{m s}^{-1}$ ) and meridional wind anomalies (contours,  $\text{m s}^{-1}$ ) regressed onto the standardized -PC1 of the leading EOF mode for 200 hPa meridional wind anomalies (a) and the standardized PC1 of the leading EOF mode for 200 hPa zonal wind anomalies (b). The values of the contours and arrows are regression coefficients. The solid red (dashed blue) contours indicate the positive (negative) meridional wind anomaly. The thick black line in (a) and (b) delineates the climatological jet axis (the gradient of the zonal wind with

515

the longitude is 0). Only anomalies statistically significant at the 0.1 level based on Student's t test are shown in (a) and (b).

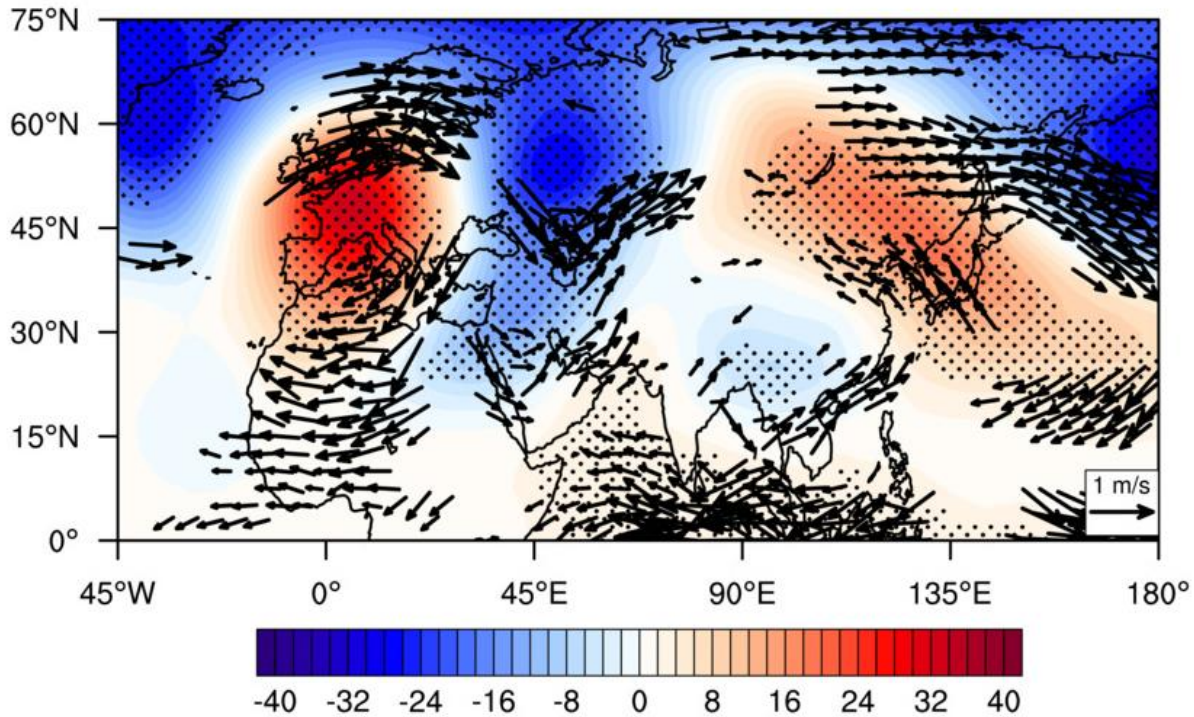

520 Figure 9: Regression of 500 hPa geopotential height anomalies and 850 hPa wind vector onto the **negative standardized -PC1** of the leading EOF mode for the 200 hPa meridional wind anomaly. The values of shading (**units, gpm**) and arrows (**units, m/s**) represent regression coefficients. Regions of dotted areas indicate anomalies exceeding the 0.05 confidence level. Only anomalies statistically significant at the 0.05 level based on Student's t test are given for the wind vector.



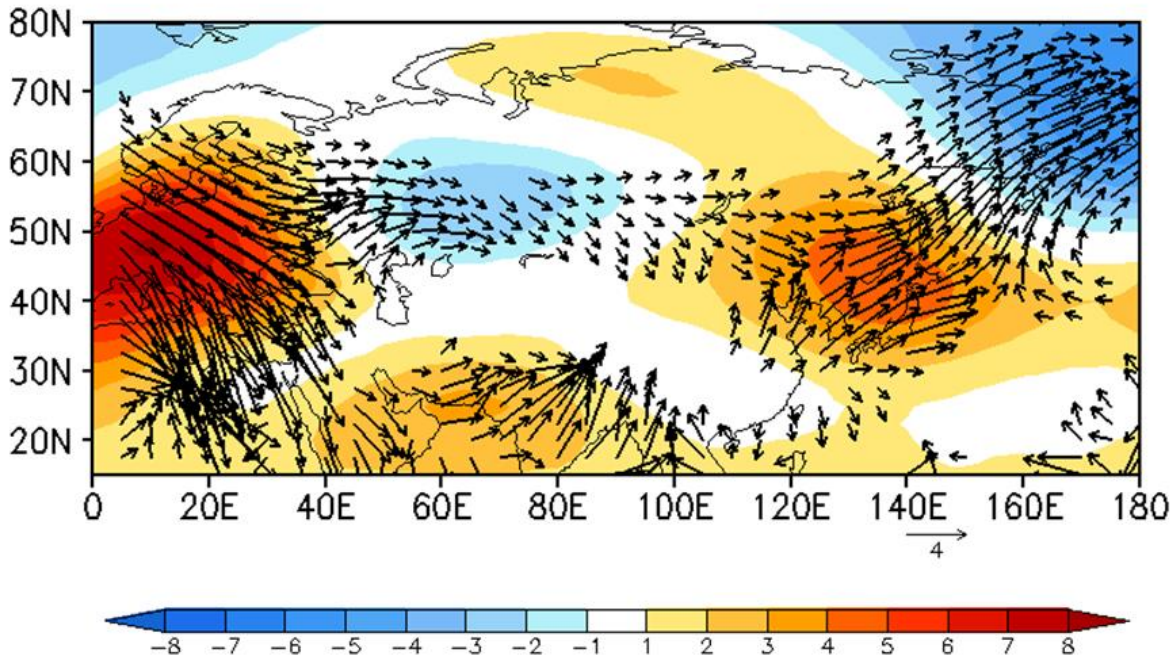

525 Figure 10: Anomalous geopotential height (shading, 10 gpm) at 500 hPa in November and December 2015 and its stationary wave activity flux (vector,  $\text{m}^{-2} \text{s}^{-2}$ ).

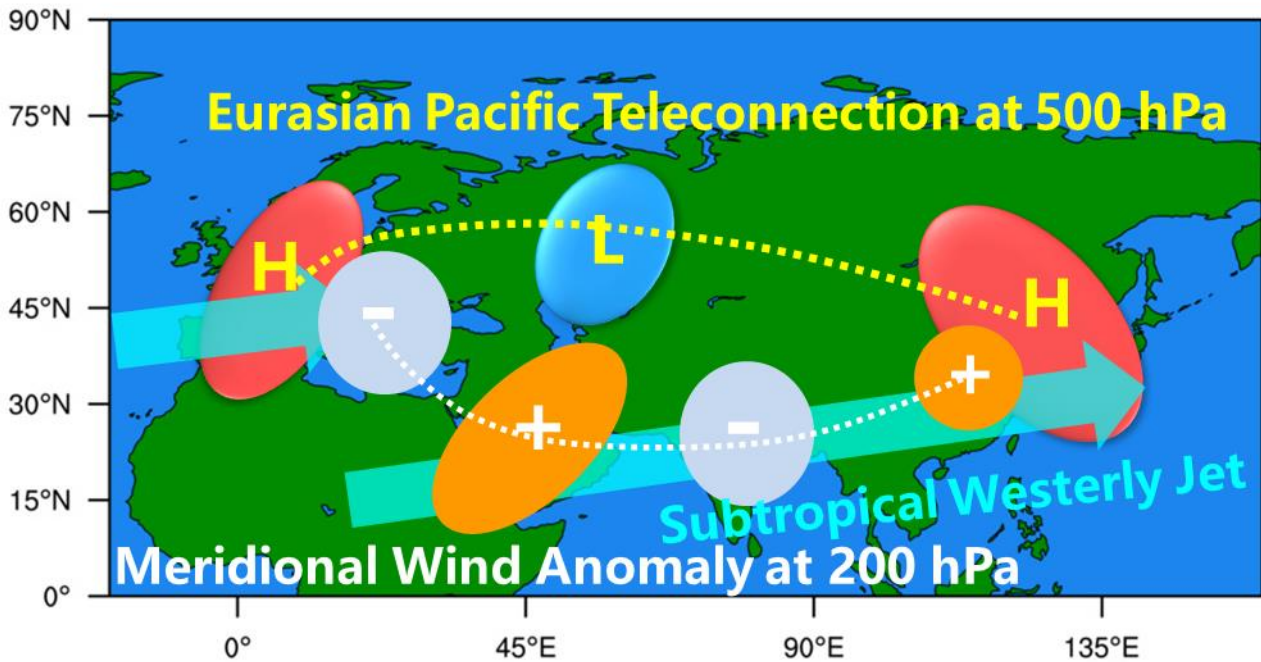

Figure 11: A schematic diagram of the negative EU in the 500 hPa geopotential height field and meridional wind anomaly at 200 hPa in November and December 2015. H (L) denotes positive (negative) geopotential height anomalies; the plus and minus represent positive (southerly) and negative (northerly) meridional wind anomalies, respectively; and the shaded belt of arrow represents the subtropical westerly jet.

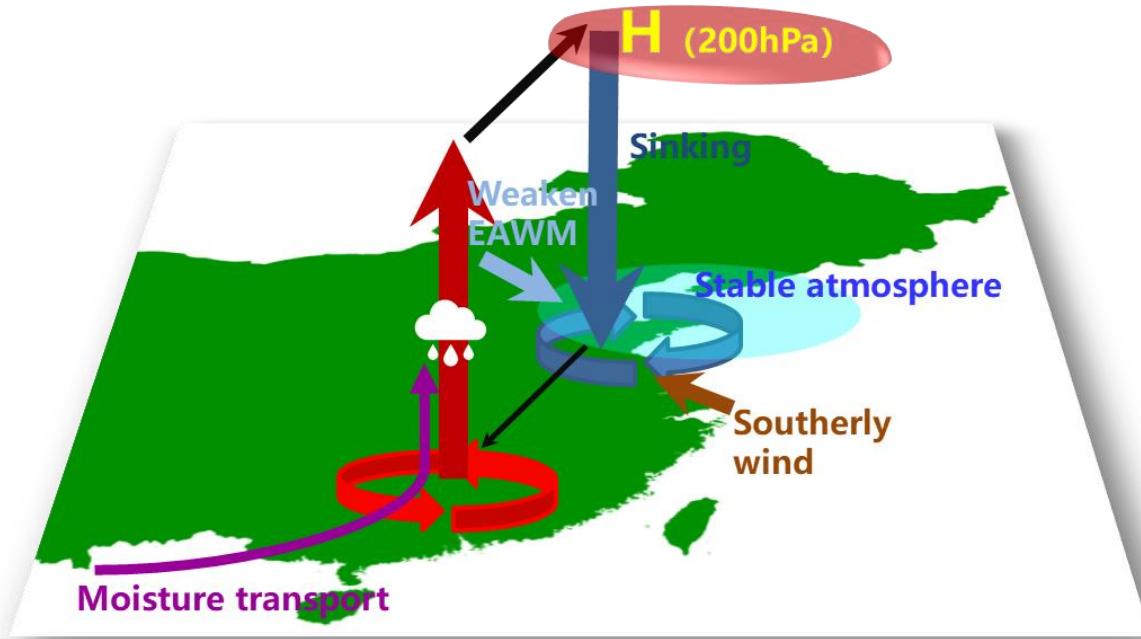

Figure 12: Schematic illustration showing circulation system affecting the haze events in November and December 2015. The red (blue) circular of arrow represents convergence (divergence); the red (blue) translucent arrow represents ascending (descending) air; the brown translucent arrow represents the southerly wind anomaly; the purple solid arrow represents the water vapor transported by southwesterly airflow from the Bay of Bengal and South China Sea; the thick (thin) black arrow represents northward (southward) movement in the atmosphere; H denotes positive geopotential height anomaly; the white weather symbol represents precipitation.

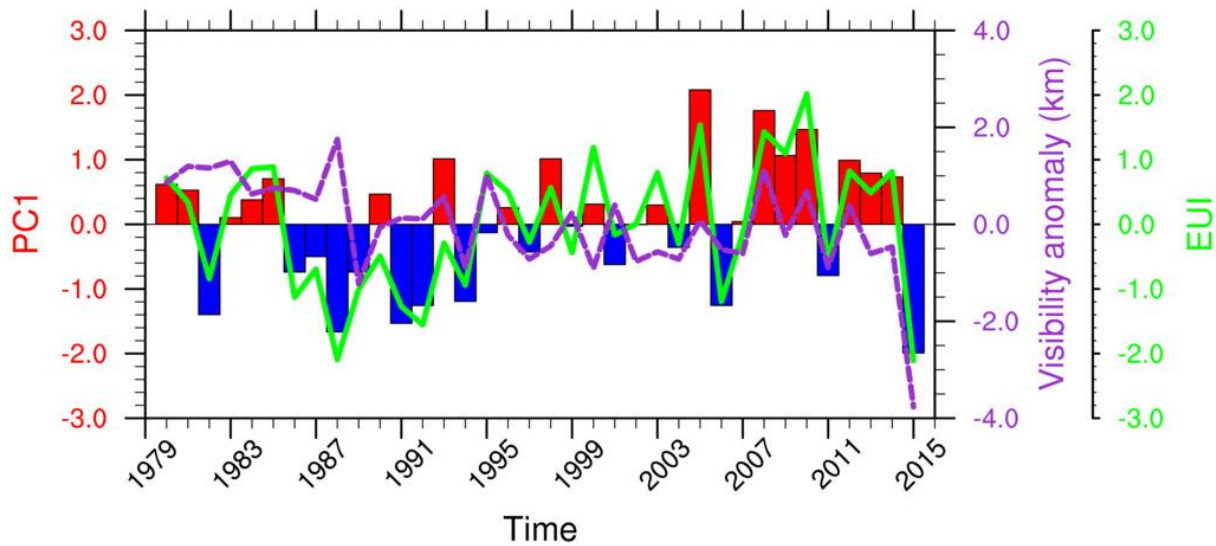

540 **Figure 13: The mean visibility anomaly (dashed line, purple) in November and December in the NCP, the EUI (solid line, green), and PC1 (bars, red and blue) of the leading EOF mode for the 200 hPa meridional wind anomaly from 1980 to 2015. The linear regression coefficient of the mean visibility onto PC1 is approximately 0.38 km, which can pass the significance test at the 95% level.**
